# Supplementary material for: Proteomic and genetic analysis of the response of S. cerevisiae to soluble copper leads to improvement of the antimicrobial function of cellulosic copper nanoparticles
Source: Royal Society of Chemistry journal article supplement (doi:10.1039/c7mt00147a), 2017-01-01
Supplement: c7mt00147a2.xlsx [file c7mt00147a2.xlsx]

## Sheet: 061110_FRT_srch03_pma_pcsl_2fc_
Supplemental Table 1
Relative protein levels of S288c and YJM789 cells grown in YM or YM with excess CuSO4, shown as log2
	ORF	protein	S288c_Cu/	YJM789_Cu/	YJM789_YM/	YJM789_Cu/
order in			S288c_YM	YJM789_YM	S288c_YM	S288c_Cu
dendro-	systematic	standard	S288c,log2	YJM789,log2	log2,(YJM789/	log2,(YJM789/
gram	name	name	(copper/YM)	(copper/YM)	S288c),YM	S288c),copper
1	YMR251W-A	Hor7	0.287469	0.0973894	1.4926	1.31173
2	YOR052C	Gtr1	0.146479	0.184184	1.37073	1.41764
3	YEL012W	Ubc8	0.154294	0.0122412	1.45117	1.31833
4	YEL024W	Rip1	0.115661	-0.0570056	1.51898	1.35552
5	YGR189C	Crh1	0.0287202	-0.131891	1.58087	1.42271
6	YGR021W	Ygr021w	-0.107208	-0.151397	1.52292	1.48794
7	YJL153C	Ino1	-0.0844854	0.0237081	1.50362	1.62102
8	YJR048W	Cyc1	0.328278	0.119472	1.917	1.7174
9	YML054C	Cyb2	0.142495	-0.00470103	1.82982	1.69183
10	YER103W	Ssa4	0.305461	-0.0151761	1.78459	1.50768
11	YLR390W-A	Ccw14	0.637284	-0.186223	2.11495	1.30429
12	YLR110C	Ccw12	0.256048	-0.601634	2.33842	1.48994
13	YDL085W	Nde2	0.345794	0.0919215	1.2884	1.04374
14	YOR285W	Rdl1	0.452788	0.0689153	1.2634	0.888739
15	YDR171W	Hsp42	0.270503	-0.0828348	1.30222	0.939282
16	YLR038C	Cox12	0.163209	0.100406	1.10602	1.05243
17	YDR055W	Pst1	0.361295	0.0427991	1.01566	0.706371
18	YMR305C	Scw10	0.781913	0.0508935	1.4894	0.767587
19	YKL087C	Cyt2	-0.220813	0.0569553	1.02068	1.30765
20	YMR145C	Nde1	-0.234156	0.124172	0.901822	1.26936
21	YFR014C	Cmk1	-0.250956	0.00514721	0.92323	1.18854
22	YBR085C-A	Ybr085c-a	-0.451174	-0.00407958	0.87374	1.33004
23	YDL231C	Bre4	-0.388334	-0.0562998	0.904514	1.24576
24	YPL134C	Odc1	-0.212574	-0.0834073	0.872531	1.01091
25	YGR049W	Scm4	-0.375888	-0.11009	0.794778	1.06978
26	YHR116W	Cox23	-0.151846	0.223828	0.643668	1.02855
27	YML128C	Msc1	-0.675506	-0.0398008	0.349379	1.03176
28	YBL036C	Ybl036c	-0.644913	-0.104031	0.312863	1.00601
29	YCR082W	Ahc2	-0.873888	-0.0524288	0.325332	1.156
30	YLR291C	Gcd7	-0.766583	0.075328	0.109743	1.08197
31	YBR126C	Tps1	-0.639645	0.097211	0.462246	1.20831
32	YMR231W	Pep5	-0.596198	-0.0838854	0.438256	1.26263
33	YJL166W	Qcr8	0.363145	-0.488996	1.51601	0.673075
34	YJR078W	Bna2	0.275222	-0.928446	1.46757	0.273107
35	YAL046C	Aim1	-0.168288	-1.33371	1.13571	-0.0205096
36	YKR065C	Pam17	-0.208633	-0.0200904	1.36253	1.56028
37	YBL015W	Ach1	-0.217332	0.0415394	1.28453	1.55261
38	YKL150W	Mcr1	-0.324127	-0.0284919	1.28814	1.59298
39	YHR092C	Hxt4	-0.231418	0.297708	1.15915	1.69748
40	YHR008C	Sod2	-0.458707	0.100864	0.93407	1.50285
41	YBR149W	Ara1	-0.488338	0.0284014	0.934458	1.46041
42	YBR120C	Cbp6	-0.535873	-0.00874721	0.993558	1.52989
43	YJR008W	Yjr008w	-0.413425	0.137929	1.04878	1.60934
44	YPL240C	Hsp82	-0.410848	0.0653781	1.28829	1.77372
45	YGR055W	Mup1	-0.542313	-0.043624	1.24456	1.75246
46	YNL052W	Cox5a	-0.439459	0.0115496	1.55719	2.0174
47	YGL107C	Rmd9	-0.758921	0.0158419	1.04162	1.82559
48	YMR188C	Mrps17	-0.676758	0.0299408	0.99528	1.71119
49	YBL030C	Pet9	-0.836669	0.109002	0.911816	1.86669
50	YOR354C	Msc6	-0.673217	0.184359	1.15716	2.02394
51	YJR073C	Opi3	-0.986224	0.0163583	0.903212	1.915
52	YNL227C	Jjj1	-1.04961	0.0147426	0.795621	1.86918
53	YHR051W	Cox6	-1.09713	-0.0379029	1.09365	2.16208
54	YOR215C	Aim41	-0.72858	-0.00695547	0.867326	1.59816
55	YDR079W	Pet100	-0.815717	0.0133216	0.822376	1.66062
56	YAL062W	Gdh3	-0.699364	0.0978054	0.677293	1.48367
57	YMR072W	Abf2	-0.959572	0.0288421	0.626747	1.62437
58	YBR230C	Om14	-1.0197	-0.0505512	0.618151	1.59651
59	YKL192C	Acp1	-0.908193	-0.103831	0.726877	1.54045
60	YOL077W-A	Atp19	-1.3273	-0.19457	1.52546	2.6674
61	YOR224C	Rpb8	-1.17499	0.0150783	0.397326	1.5966
62	YDL219W	Dtd1	-1.16984	-0.0923635	0.350312	1.43699
63	YDR424C	Dyn2	-1.32452	-0.013016	0.206644	1.52736
64	YAL007C	Erp2	-1.1188	0.228307	0.386338	1.74266
65	YIL051C	Mmf1	-1.32794	-0.0428028	0.444737	1.73908
66	YLR033W	Rsc58	-1.41587	-0.101462	0.343964	1.66758
67	YBR244W	Gpx2	-1.5065	-0.112771	0.452628	1.85557
68	YER057C	Hmf1	-1.5282	0.0326134	0.596083	2.16611
69	YML121W	Gtr1	-1.8118	0.0161202	0.340485	2.17761
70	YOR236W	Dfr1	-1.13396	0.573648	-0.346377	1.4289
71	YOR130C	Ort1	-1.23599	-0.0498999	0.00986004	1.20516
72	YDL081C	Rpp1a	-2.00223	-0.00936894	-0.373261	1.62881
73	YGR087C	Pdc6	0.190939	0.181607	2.63366	2.63354
74	YGR142W	Btn2	0.0590224	0.00826329	2.59542	2.55353
75	YLL057C	Jlp1	0.324512	0.145756	2.60153	2.43198
76	YPL187W	Mf(alpha)1	-0.247047	-0.0540447	2.54722	2.74943
77	YNL126W	Spc98	0.0217217	-0.156979	2.27453	2.10504
78	YMR122W-A	Ncw1	0.664476	0.248989	2.68855	2.28227
79	YDR077W	Sed1	0.297967	0.0655878	3.74787	3.5247
80	YNL190W	Ynl190w	1.4742	-0.755821	3.49168	1.27087
81	YHR053C,YHR055C	Cup1	3.47681	0.196258	2.58534	-0.686012
82	YOR382W	Fit2	2.44751	-0.116516	0.16745	-2.38737
83	YKR050W	Trk2	0.873236	-0.320221	-0.794776	-1.97903
84	YMR058W	Fet3	1.18011	-0.105321	-1.42919	-2.63048
85	YPR124W	Ctr1	-1.96646	-0.494307	-1.37989	0.101468
86	YGL181W	Gts1	0.0688457	-0.00319674	-2.41934	-2.86067
87	YPL242C	Iqg1	-0.430529	0.108899	-2.63431	-2.08567
88	YKR039W	Gap1	-0.197418	-0.0957928	-2.15982	-2.04899
89	YGR234W	Yhb1	0.208714	0.0403169	-2.00907	-2.16826
90	YNR050C	Lys9	0.0600516	-0.0646752	-1.9535	-2.06902
91	YOR301W	Rax1	0.777851	-0.677404	-0.0791324	-1.52518
92	YDR063W	Aim7	0.371278	-0.705565	-0.172507	-1.24014
93	YGL255W	Zrt1	1.14137	0.123163	-0.267745	-0.848357
94	YJR147W	Hms2	0.690196	0.0237392	-0.797	-1.45425
95	YDL130W	Rpp1b	0.767655	-0.00273873	-0.516673	-1.27786
96	YMR173W	Ddr48	0.65338	0.0056942	-0.563538	-1.20202
97	YGR233C	Pho81	0.16405	-0.074086	-0.864931	-1.09724
98	YLR231C	Bna5	0.352372	-0.153179	-0.540273	-1.04414
99	YGL028C	Scw11	0.453085	-0.0544518	-0.749962	-1.24829
100	YMR096W	Snz1	-0.675261	-0.11526	-1.33293	-0.763721
101	YNL142W	Mep2	-0.811186	0.0240999	-1.58922	-0.744725
102	YDL182W	Lys20	-0.357983	-0.0217445	-1.41032	-1.06487
103	YJL200C	Aco2	-0.459078	0.102891	-1.70877	-1.19362
104	YLR142W	Put1	0.0839311	0.0260155	-1.443	-1.49171
105	YHR094C	Hxt1	-0.206515	-0.0461414	-1.77018	-1.6006
106	YJL133C-A	Yjl133c-a	-0.0875714	0.204095	-1.32429	-1.02341
107	YPL019C	Vtc3	-0.127228	0.0521084	-1.10035	-0.89131
108	YJL052W	Tdh1	-0.262417	0.081551	-1.18713	-0.833952
109	YLR413W	Ina1	0.000426226	-0.340574	-1.08775	-1.41955
110	YLR286C	Cts1	0.208662	0.00139281	-1.02974	-1.2278
111	YIR032C	Dal3	0.321543	0.0648893	-1.0965	-1.34395
112	YJR025C	Bna1	0.288014	0.0410836	-1.13906	-1.37678
