# Supplementary material for: Proteomic and genetic analysis of the response of S. cerevisiae to soluble copper leads to improvement of the antimicrobial function of cellulosic copper nanoparticles
Source: Royal Society of Chemistry journal article supplement (doi:10.1039/c7mt00147a), 2017-01-01
Supplement: c7mt00147a4.xlsx [file c7mt00147a4.xlsx]

## Sheet: Sheet1
Supplemental table 3
	end pt	end pt	12h difference*	end pt difference*		*YM OD - YM/50uM CuSO4 OD
Set 1	YM+Lysine	50uM Cu
YJM789	0.842267	0.2109	0.476067	0.631367
S96	0.705	0.858033	-0.0836667	-0.153033
Seg 2	0.861333	0.804567	0.367367	0.0567667
Seg 3	0.977	0.911333	0.279367	0.0656667
Seg 4	1.02993	0.995133	0.265633	0.0348
Seg 5	0.942333	0.888367	0.4379	0.0539667
Seg 7	0.920033	0.921367	0.104367	-0.00133333
Seg 9	0.811433	0.4618	0.348067	0.349633
Seg 10	1.02067	0.936533	0.186233	0.0841333
Seg 11	0.9293	0.8733	0.244533	0.056
Seg 14	0.936233	0.868333	0.392867	0.0679
Seg 16	1.0392	1.02623	0.2312	0.0129667
Seg 17	0.8267	0.854467	0.0774	-0.0277667
Seg 18	0.953367	0.869667	0.248767	0.0837
Set 2
YJM789	0.6709	0.1618	0.348367	0.5091
S96	0.631767	0.7662	-0.0716667	-0.134433
Seg 19	0.6649	0.507133	0.218167	0.157767
Seg 21	0.771067	0.836733	0.151	-0.0656667
Seg 23	0.7173	0.3135	0.308933	0.4038
Seg 24	0.767033	0.829867	0.0507	-0.0628333
Seg 25	0.816567	0.905633	-0.0233	-0.0890667
Seg 27	0.815267	0.7294	0.226933	0.0858667
Seg 29	0.680933	0.705367	-0.00533333	-0.0244333
Seg 30	0.939833	0.784733	0.346267	0.1551
Seg 31	0.908833	0.371	0.277667	0.537833
Seg 33	0.8267	0.893467	0.0201	-0.0667667
Seg 35	0.9228	0.867467	0.2016	0.0553333
Seg 36	0.753567	0.579833	0.281033	0.173733
Seg 39	1.0188	0.940467	0.3472	0.0783333
Seg 40	0.859767	0.843967	0.0533	0.0158
Set 3
YJM789	0.626967	0.235	0.283467	0.391967
S96	0.788767	0.790867	0.00583333	-0.0021
Seg 41	0.699833	0.7422	-0.0130667	-0.0423667
Seg 42	0.939433	0.822867	0.2669	0.116567
Seg 44	0.808867	0.728	0.178067	0.0808667
Seg 53	0.850633	0.808167	0.0449333	0.0424667
Seg 55	0.963067	0.852467	0.3625	0.1106
Seg 57	0.8245	0.829133	0.0005	-0.00463333
Seg 59	0.901733	0.886067	0.0900333	0.0156667
Seg 60	0.6099	0.195767	0.318	0.414133
Seg 61	0.927833	0.8901	0.101067	0.0377333
Seg 62	0.925333	0.897367	0.1237	0.0279667
Seg 63	0.599867	0.550433	0.0101333	0.0494333
Seg 67	0.928567	0.888367	0.166333	0.0402
Seg 68	0.930733	0.942067	0.129333	-0.0113333
Seg 70	0.930033	0.9191	0.2298	0.0109333
Set 4
YJM789	0.794533	0.2425	0.424933	0.552033
S96	0.6752	0.829267	-0.1099	-0.154067
Seg 74	0.7717	0.879233	-0.0655	-0.107533
Seg 76	0.915067	0.863033	0.0907333	0.0520333
Seg 77	0.8144	0.816967	0.122633	-0.00256667
Seg 78	0.950567	0.991133	0.141633	-0.0405667
Seg 80	0.845233	0.767267	0.1564	0.0779667
Seg 81	0.9055	0.8967	0.101033	0.0088
Seg 82	0.811233	0.589567	0.404867	0.221667
Seg 84	0.901033	0.834533	0.3753	0.0665
Seg 85	0.830267	0.734867	0.119667	0.0954
Seg 87	0.899567	0.901167	0.0848667	-0.0016
Seg 88	0.776	0.738967	0.0674333	0.0370333
Seg 89	0.8013	0.7001	0.259833	0.1012
Seg 90	0.758867	0.537367	0.355	0.2215
Seg 91	0.933533	0.905567	0.0579667	0.0279667
Set 5
YJM789	0.7789	0.246967	0.382333	0.531933
S96	0.774033	0.796933	-0.0021	-0.0229
Seg 92	0.842267	0.811733	0.0785667	0.0305333
Seg 93	0.9752	0.974333	0.0319667	0.000866667
Seg 95	0.876933	0.908933	0.108267	-0.032
Seg 96	0.886467	0.429333	0.3686	0.457133
Seg 97	0.832533	0.838067	0.1808	-0.00553333
Seg 99	0.764833	0.7309	0.131367	0.0339333
Seg 100	0.828533	0.768867	0.1068	0.0596667
Seg 107	0.782033	0.755167	0.0465	0.0268667
Seg 109	0.9313	0.946633	0.0876333	-0.0153333
Seg 110	0.987967	0.9882	0.149533	-0.000233333
Seg 111	0.783267	0.661867	0.1762	0.1214
Seg 113	0.9032	0.765067	0.324667	0.138133
Seg 114	0.893367	0.629633	0.217067	0.263733
Seg 115	0.961367	0.9798	0.150267	-0.0184333
Set 6
YJM789	0.734033	0.214833	0.375867	0.5192
S96	0.6567	0.795967	-0.0761333	-0.139267
Seg 117	0.871633	0.760433	0.4697	0.1112
Seg 118	0.7037	0.563067	0.150567	0.140633
Seg 119	0.7738	0.873967	-0.0302	-0.100167
Seg 121	0.7223	0.742433	-0.00573333	-0.0201333
Seg 122	0.803767	0.179733	0.312767	0.624033
Seg 123	0.9943	1.00307	0.0785	-0.00876667
Seg 124	0.879933	0.875233	0.131067	0.0047
Seg 125	0.9082	0.801467	0.314933	0.106733
Seg 126	0.605967	0.5847	0.0290667	0.0212667
Seg 127	0.893467	0.668333	0.252333	0.225133
Seg 130	0.653233	0.5993	0.00803333	0.0539333
Seg 131	0.811667	0.5674	0.229	0.244267
Seg 132	1.02143	0.481867	0.347967	0.539567
Set 7
YJM789	0.676367	0.143667	0.361633	0.5327
S96	0.6063	0.763333	-0.0888	-0.157033
Seg 133	0.699133	0.4056	0.32	0.293533
Seg 134	0.9192	0.9346	0.0337667	-0.0154
Seg 135	0.696333	0.7473	0.0287	-0.0509667
Seg 136	0.778533	0.604067	0.382867	0.174467
Seg 138	0.7889	0.893633	0.0182	-0.104733
Seg 139	0.922433	0.9442	0.0280333	-0.0217667
Seg 140	0.732333	0.5939	0.163	0.138433
Seg 141	0.771567	0.774833	0.0270667	-0.00326667
Seg 142	0.9846	0.911433	0.362433	0.0731667
Seg 145	0.9903	1.0192	0.125033	-0.0289
Seg 147	0.800833	0.731533	0.216867	0.0693
Seg 151	0.910133	0.868567	0.1381	0.0415667
Seg 152	0.883367	0.708333	0.188233	0.175033
Seg 154	0.7554	0.531567	0.283133	0.223833
Set 8
YJM789	0.689633	0.194133	0.330167	0.4955
S96	0.596467	0.828033	-0.117467	-0.231567
Seg 155	0.7177	0.436033	0.109567	0.281667
Seg 156	0.7312	0.891267	-0.0458333	-0.160067
Seg 157	0.703333	0.7717	-0.0351667	-0.0683667
Seg 158	0.646	0.8446	-0.0648667	-0.1986
Seg 159	0.754133	0.841667	0.143167	-0.0875333
Seg 160	0.8159	0.7856	0.214033	0.0303
Seg 161	0.8011	0.7462	0.0625	0.0549
Seg 162	0.761733	0.787533	0.0254	-0.0258
Seg 163	0.955033	0.946433	0.149633	0.0086
Seg 164	0.8275	0.752367	0.182433	0.0751333
Seg 165	0.815633	0.741567	0.0885333	0.0740667
Seg 167	0.964433	0.872467	0.154467	0.0919667
Seg 169	0.8678	0.607167	0.213233	0.260633
Seg 171	0.695067	0.7101	0.0282	-0.0150333
Set 9
YJM789	0.722233	0.220767	0.348267	0.501467
S96	0.624133	0.8421	-0.0939333	-0.217967
Seg 172	0.798767	0.976067	-0.0639667	-0.1773
Seg 177	0.8437	0.9347	0.0142	-0.091
Seg 178	0.760567	0.677967	0.100733	0.0826
Seg 180	0.866033	0.8872	0.0743667	-0.0211667
Seg 181	0.747167	0.820033	0.1073	-0.0728667
Seg 182	0.8318	0.878833	0.0180333	-0.0470333
Seg 183	0.9449	0.9092	0.287733	0.0357
Seg 184	0.846767	0.783133	0.136933	0.0636333
Seg 186	0.951433	0.339167	0.3809	0.612267
Seg 188	0.639667	0.203833	0.273433	0.435833
Seg 189	0.791767	0.6438	0.321133	0.147967
Seg 190	0.814667	0.6333	0.3126	0.181367
Seg 194	1.0397	0.9687	0.202833	0.071
Seg 195	0.8444	0.494533	0.368	0.349867
Set 10
YJM789	0.7026	0.165067	0.340267	0.537533
S96	0.649533	0.7709	-0.0233667	-0.121367
Seg 196	0.661933	0.777867	-0.0679333	-0.115933
Seg 198	0.963933	0.994433	0.0132333	-0.0305
Seg 199	0.737033	0.734933	0.111233	0.0021
blank	0.0668333	0.0666	0.0002	0.000233333
