# Supplementary material for: Proteomic and genetic analysis of the response of S. cerevisiae to soluble copper leads to improvement of the antimicrobial function of cellulosic copper nanoparticles
Source: Royal Society of Chemistry journal article supplement (doi:10.1039/c7mt00147a), 2017-01-01
Supplement: c7mt00147a5.xlsx [file c7mt00147a5.xlsx]

## Sheet: snp_lod_mean_ZL mapping
Supplemental Table 2
chromosome	Marker		SNP	LOD		M=multiple
chr01	1505	1506	M	0.30103		D=deletion
chr01	1516.5	1518	M	0.30103		I=insertion
chr01	2328	2328	D	0.30103
chr01	2331	2334	D	0.30103
chr01	2335.5	2335.5	I	0.30103
chr01	2338	2340.5	M	0.508638
chr01	2825	2825	S	0.30103
chr01	2877.5	2877.5	I	0.30103
chr01	2891	2891	S	0.30103
chr01	2914	2914	S	0.30103
chr01	3359	3359	S	0.30103
chr01	3688	3688	S	0.30103
chr01	3943	3943	S	0.30103
chr01	4120	4120	S	0.30103
chr01	4226	4228	D	0.30103
chr01	4598	4598	S	0.30103
chr01	4802	4802	S	0.30103
chr01	4819	4820	M	0.30103
chr01	4832	4832	S	0.30103
chr01	4837	4837	S	0.30103
chr01	4994	4994	S	0.30103
chr01	5028.5	5028.5	I	0.30103
chr01	5030.5	5032	M	0.30103
chr01	5036	5036	S	0.30103
chr01	5048	5048	S	0.30103
chr01	5219	5219	S	0.30103
chr01	5238	5238	S	0.30103
chr01	5244	5244	S	0.508638
chr01	5452	5452	S	0.30103
chr01	5464	5464	S	0.30103
chr01	5467	5467	S	0.30103
chr01	5570	5570	S	0.30103
chr01	5577	5577	S	0.30103
chr01	5647	5647	S	0.30103
chr01	5742	5742	S	0.30103
chr01	5757	5757	S	0.30103
chr01	5764	5764	S	0.30103
chr01	6001	6001	S	0.30103
chr01	6153	6153	S	0.30103
chr01	6201	6201	S	0.30103
chr01	6356	6356	S	0.30103
chr01	6365	6365	S	0.30103
chr01	7077	7077	S	0.30103
chr01	7269	7269	S	0.30103
chr01	11108	11108	S	0.30103
chr01	11611	11611	S	0.30103
chr01	11731	11744	M	0.30103
chr01	13285	13300	M	0.30103
chr01	13303	13304.5	M	0.30103
chr01	26955	26959	M	0.30103
chr01	27130	27130	S	0.30103
chr01	27142	27142	S	0.30103
chr01	27152	27152	S	0.30103
chr01	27184	27184	S	0.30103
chr01	27187	27189	M	0.30103
chr01	27196	27196	S	0.30103
chr01	27659	27659	S	0.30103
chr01	28169	28169	S	0.30103
chr01	28280	28280	S	0.30103
chr01	28503	28503	S	0.508638
chr01	28590	28590	S	0.30103
chr01	28603	28603	S	0.30103
chr01	28637	28637	S	0.30103
chr01	28662	28664.5	M	0.30103
chr01	28668	28668	S	0.30103
chr01	28678	28678	S	0.30103
chr01	28685	28685	S	0.30103
chr01	28686	28686	S	0.30103
chr01	28717	28717	S	0.30103
chr01	28721	28721	S	0.30103
chr01	28747	28747	S	0.30103
chr01	28782	28782	S	0.30103
chr01	28788	28788	S	0.30103
chr01	28795	28795	S	0.30103
chr01	29280	29280	S	0.30103
chr01	29642	29642	S	0.30103
chr01	29664.5	29664.5	I	0.30103
chr01	29979	29979	S	0.30103
chr01	31019	31019	S	0.508638
chr01	32557	32557	S	0.508638
chr01	32651.5	32655	M	0.508638
chr01	32767	32767	S	0.508638
chr01	32881	32881	S	0.508638
chr01	33148	33148	S	0.508638
chr01	33342	33342	S	0.508638
chr01	33347.5	33350	M	0.508638
chr01	33381	33381	S	0.79588
chr01	33513	33513	S	0.508638
chr01	33549	33549	S	0.508638
chr01	33613	33613	S	0.508638
chr01	33757	33757	S	0.508638
chr01	33865	33865	S	0.508638
chr01	33868	33868	S	0.508638
chr01	34510	34510	S	0.508638
chr01	34549	34549	S	0.508638
chr01	34911	34911	S	0.508638
chr01	35060	35060	S	0.508638
chr01	35071	35071	S	0.508638
chr01	35422	35422	S	0.508638
chr01	35632	35632	S	0.508638
chr01	35819	35819	S	0.508638
chr01	35890	35890	S	0.508638
chr01	35977	35977	S	0.508638
chr01	36006	36006	S	0.508638
chr01	36049	36049	S	0.508638
chr01	36120	36120	S	0.30103
chr01	36124	36124	S	0.30103
chr01	36161	36161	S	0.508638
chr01	36361	36361	S	0.30103
chr01	36525	36525	S	0.508638
chr01	36575	36575	S	0.508638
chr01	36638	36638	S	0.508638
chr01	37020	37020	S	0.508638
chr01	37200	37200	S	0.508638
chr01	37331	37331	S	0.79588
chr01	37554	37554	S	0.508638
chr01	37596	37596	S	0.508638
chr01	37725	37725	S	0.508638
chr01	37977	37977	S	0.508638
chr01	38001	38001	S	0.508638
chr01	38121	38121	S	0.508638
chr01	38362	38362	S	0.508638
chr01	38491	38491	S	0.508638
chr01	38505	38505	S	0.508638
chr01	38509	38509	S	0.508638
chr01	38525	38525	S	0.508638
chr01	38534	38534	S	0.508638
chr01	38658	38658	S	0.508638
chr01	38889	38889	S	0.508638
chr01	38981	38981	S	0.508638
chr01	39010	39010	S	0.508638
chr01	39047	39047	S	0.508638
chr01	39106	39106	S	0.508638
chr01	39124	39124	S	0.508638
chr01	39163	39163	S	0.508638
chr01	39389	39389	S	0.508638
chr01	39796	39796	S	0.508638
chr01	39902	39902	S	0.508638
chr01	39920	39920	S	0.508638
chr01	39921	39921	S	0.508638
chr01	40065	40065	S	0.508638
chr01	40231	40231	S	0.508638
chr01	40238	40238	S	0.508638
chr01	40381	40381	S	0.508638
chr01	40861	40861	S	0.508638
chr01	40867	40867	S	0.508638
chr01	40915	40915	S	0.508638
chr01	41279	41279	S	0.508638
chr01	41482	41482	S	0.508638
chr01	41500	41500	S	0.508638
chr01	41588	41588	S	0.508638
chr01	41737	41737	S	0.508638
chr01	41740	41740	S	0.508638
chr01	41803	41803	S	0.508638
chr01	41884	41884	S	0.508638
chr01	41988	41988	S	0.508638
chr01	42116	42116	S	0.508638
chr01	42258	42258	S	0.508638
chr01	42485	42485	S	0.508638
chr01	42528	42528	S	0.508638
chr01	42555	42555	S	0.508638
chr01	42563	42563	S	0.508638
chr01	42591	42591	S	0.508638
chr01	42630	42630	S	0.508638
chr01	42636	42636	S	0.508638
chr01	42663	42663	S	0.508638
chr01	42685	42685	S	0.508638
chr01	43005	43005	S	0.508638
chr01	43479	43479	S	0.508638
chr01	43533	43533	S	0.508638
chr01	43785	43785	S	0.508638
chr01	44385	44385	S	0.30103
chr01	44589	44589	S	0.30103
chr01	44892	44892	S	0.30103
chr01	44936	44936	S	0.30103
chr01	45025	45025	S	0.30103
chr01	45199	45199	S	0.30103
chr01	45286	45286	S	0.30103
chr01	45700	45700	S	0.30103
chr01	45832	45832	S	0.30103
chr01	46118	46118	S	0.30103
chr01	46670	46670	S	0.30103
chr01	46928	46928	S	0.30103
chr01	46967	46967	S	0.30103
chr01	47045	47045	S	0.30103
chr01	47207	47207	S	0.30103
chr01	47519	47519	S	0.30103
chr01	47846	47846	S	0.30103
chr01	47897	47897	S	0.30103
chr01	47909	47909	S	0.30103
chr01	48116	48116	S	0.30103
chr01	48303	48303	S	0.30103
chr01	48527	48527	S	0.30103
chr01	48675	48675	S	0.30103
chr01	48752	48752	S	0.30103
chr01	48756	48756	S	0.30103
chr01	48767	48767	S	0.30103
chr01	48772	48772	S	0.30103
chr01	48891	48891	S	0.30103
chr01	48909	48909	S	0.30103
chr01	49104	49104	S	0.30103
chr01	49404	49404	S	0.30103
chr01	49590	49590	S	0.30103
chr01	49810	49810	S	0.30103
chr01	49872	49872	S	0.30103
chr01	50205	50205	S	0.30103
chr01	50271	50271	S	0.30103
chr01	50327	50328.5	M	0.30103
chr01	50344	50344	S	0.30103
chr01	50355	50355	S	0.30103
chr01	50385	50385	S	0.30103
chr01	50412	50412	S	0.30103
chr01	50457	50457	S	0.30103
chr01	50499	50499	S	0.30103
chr01	50697	50697	S	0.30103
chr01	51096	51096	S	0.30103
chr01	51288	51288	S	0.30103
chr01	51294	51294	S	0.30103
chr01	51322	51322	S	0.30103
chr01	51351	51351	S	0.30103
chr01	51367	51367	S	0.30103
chr01	51372	51372	S	0.30103
chr01	51435	51435	S	0.30103
chr01	51489	51489	S	0.30103
chr01	51952	51952	S	0.30103
chr01	52165	52165	S	0.30103
chr01	52604	52604	S	0.30103
chr01	52614	52614	S	0.30103
chr01	52633	52633	S	0.30103
chr01	52847	52847	S	0.30103
chr01	52850	52850	S	0.30103
chr01	52859	52859	S	0.30103
chr01	52940	52940	S	0.30103
chr01	52952	52952	S	0.30103
chr01	52985	52985	S	0.30103
chr01	52997	52997	S	0.30103
chr01	53147	53147	S	0.30103
chr01	53168	53168	S	0.30103
chr01	53267	53267	S	0.30103
chr01	53543	53543	S	0.30103
chr01	53837	53837	S	0.30103
chr01	53844	53844	S	0.30103
chr01	53852	53852	S	0.30103
chr01	53936	53936	S	0.30103
chr01	54176	54176	S	0.30103
chr01	54199	54199	S	0.30103
chr01	54245	54245	S	0.30103
chr01	54320	54320	S	0.30103
chr01	54479	54479	S	0.30103
chr01	54482	54482	S	0.30103
chr01	54509	54509	S	0.30103
chr01	54662	54662	S	0.30103
chr01	54680	54680	S	0.30103
chr01	54743	54743	S	0.30103
chr01	54785	54785	S	0.30103
chr01	54807	54807	S	0.30103
chr01	55146	55146	S	0.30103
chr01	55172	55172	S	0.30103
chr01	55214	55214	S	0.30103
chr01	55257	55257	S	0.30103
chr01	55328	55328	S	0.30103
chr01	55509	55509	S	0.30103
chr01	55689	55689	S	0.508638
chr01	55794	55794	S	0.30103
chr01	56008	56008	S	0.30103
chr01	56059	56059	S	0.30103
chr01	56108	56108	S	0.30103
chr01	56130	56130	S	0.30103
chr01	56145	56145	S	0.30103
chr01	56196	56196	S	0.30103
chr01	56352	56352	S	0.30103
chr01	56872	56872	S	0.508638
chr01	56879	56879	S	0.508638
chr01	56895.5	56895.5	I	0.508638
chr01	56905	56905	S	0.508638
chr01	57042	57042	S	0.30103
chr01	57156	57156	S	0.508638
chr01	57670	57670	S	0.30103
chr01	57854	57854	S	0.30103
chr01	58074	58074	S	0.30103
chr01	58167	58167	S	0.30103
chr01	59230	59230	S	0.508638
chr01	59350	59350	S	0.30103
chr01	59660	59660	S	0.30103
chr01	59758	59758	S	0.30103
chr01	60199	60199	S	0.30103
chr01	60268	60268	S	0.30103
chr01	60388	60388	S	0.30103
chr01	60775	60775	S	0.30103
chr01	61586	61586	S	0.30103
chr01	61679	61679	S	0.30103
chr01	61745	61745	S	0.30103
chr01	61769	61769	S	0.30103
chr01	61991	61991	S	0.30103
chr01	62054	62054	S	0.30103
chr01	62132	62132	S	0.30103
chr01	62135	62135	S	0.30103
chr01	62285	62285	S	0.30103
chr01	62309	62309	S	0.30103
chr01	62362	62362	S	0.30103
chr01	62566	62566	S	0.30103
chr01	62727	62727	S	0.30103
chr01	62951	62951	S	0.30103
chr01	63026	63026	S	0.30103
chr01	63386	63386	S	0.30103
chr01	63521	63521	S	0.30103
chr01	63561	63561	S	0.30103
chr01	63659	63659	S	0.30103
chr01	64095	64095	S	0.30103
chr01	64280	64280	S	0.30103
chr01	64478	64478	S	0.30103
chr01	64664	64664	S	0.30103
chr01	64677	64677	S	0.30103
chr01	64908	64908	S	0.30103
chr01	65037	65037	S	0.30103
chr01	65489	65489	S	0.30103
chr01	66004	66004	S	0.30103
chr01	66130	66130	S	0.30103
chr01	67121	67121	S	0.30103
chr01	67270	67270	S	0.30103
chr01	67276	67276	S	0.30103
chr01	67477	67477	S	0.30103
chr01	67716	67716	S	0.30103
chr01	67856	67856	S	0.30103
chr01	68680	68680	S	0.30103
chr01	68726	68726	S	0.30103
chr01	68740	68740	S	0.30103
chr01	68870	68870	S	0.30103
chr01	69113	69113	S	0.30103
chr01	69281	69281	S	0.30103
chr01	69404	69404	S	0.30103
chr01	69586	69586	S	0.30103
chr01	69604	69604	S	0.30103
chr01	69768	69768	S	0.30103
chr01	69952	69952	S	0.30103
chr01	69982	69982	S	0.30103
chr01	70025	70025	S	0.30103
chr01	70046	70046	S	0.30103
chr01	70072	70072	S	0.30103
chr01	70229	70229	S	0.30103
chr01	70346	70346	S	0.30103
chr01	70462	70462	S	0.30103
chr01	70498	70498	S	0.30103
chr01	70622	70622	S	0.30103
chr01	70906	70906	S	0.30103
chr01	70944	70944	S	0.30103
chr01	71282	71282	S	0.30103
chr01	71313	71313	S	0.30103
chr01	71532	71532	S	0.30103
chr01	71541	71544	D	0.30103
chr01	71602	71602	S	0.30103
chr01	71617	71617	S	0.30103
chr01	72953	72953	S	0.30103
chr01	73491	73491	S	0.30103
chr01	73520	73520	S	0.30103
chr01	73645	73645	S	0.30103
chr01	73663	73663	S	0.30103
chr01	73695	73695	S	0.30103
chr01	73704	73704	S	0.30103
chr01	73721	73721	S	0.30103
chr01	73802	73802	S	0.30103
chr01	74137	74137	S	0.508638
chr01	74208.5	74210	M	0.508638
chr01	74228	74228	S	0.508638
chr01	74242	74242	S	0.508638
chr01	74724	74724	S	0.30103
chr01	74731	74731	S	0.30103
chr01	74827	74827	S	0.30103
chr01	74844	74844	S	0.30103
chr01	75039	75039	S	0.30103
chr01	75074	75074	S	0.508638
chr01	75276.5	75278	M	0.30103
chr01	75913	75913	S	0.30103
chr01	76031	76031	S	0.30103
chr01	76097	76097	S	0.30103
chr01	76118	76118	S	0.30103
chr01	76267	76267	S	0.30103
chr01	76418	76418	S	0.30103
chr01	76497	76498	M	0.30103
chr01	76556	76556	S	0.30103
chr01	76841	76841	S	0.508638
chr01	76862	76862	S	0.30103
chr01	76877	76877	S	0.30103
chr01	77074	77074	S	0.30103
chr01	77116	77116	S	0.508638
chr01	77434	77434	S	0.30103
chr01	77555	77555	S	0.30103
chr01	77885	77885	S	0.508638
chr01	78188	78188	S	0.508638
chr01	78347	78347	S	0.508638
chr01	78393	78393	S	0.508638
chr01	78462	78462	S	0.508638
chr01	78561	78561	S	0.508638
chr01	78701	78701	S	0.508638
chr01	78911	78911	S	0.508638
chr01	78930	78930	S	0.508638
chr01	78970.5	78974	M	0.508638
chr01	79013	79013	S	0.508638
chr01	79086	79086	S	0.508638
chr01	79379	79379	S	0.508638
chr01	79435	79435	S	0.508638
chr01	79450	79450	S	0.508638
chr01	79568.5	79568.5	I	0.508638
chr01	79660	79660	S	0.508638
chr01	79681	79681	S	0.508638
chr01	79808	79808	S	0.508638
chr01	79901	79901	S	0.508638
chr01	79925	79925	S	0.508638
chr01	80078	80078	S	0.508638
chr01	80555	80555	S	0.508638
chr01	80947	80947	S	0.508638
chr01	81692	81692	S	0.508638
chr01	81732	81732	S	0.508638
chr01	81740	81740	S	0.508638
chr01	81842	81842	S	0.508638
chr01	82100	82100	S	0.508638
chr01	82231	82231	S	0.508638
chr01	82245	82245	S	0.508638
chr01	82324	82324	S	0.79588
chr01	82380	82380	S	0.508638
chr01	82445	82445	S	0.508638
chr01	82663	82663	S	0.508638
chr01	82671	82671	S	0.508638
chr01	82712	82712	S	0.508638
chr01	83310	83310	S	0.508638
chr01	83614	83614	S	0.508638
chr01	83756	83756	S	0.79588
chr01	83904	83904	S	0.508638
chr01	84107	84107	S	0.508638
chr01	84109	84109	S	0.508638
chr01	84320	84320	S	0.79588
chr01	84350	84350	S	0.508638
chr01	84439	84439	S	0.508638
chr01	84859	84859	S	0.79588
chr01	85035	85035	S	0.79588
chr01	85266	85266	S	0.79588
chr01	85374	85374	S	0.79588
chr01	85437	85437	S	0.79588
chr01	85481	85481	S	0.79588
chr01	85591	85591	S	0.79588
chr01	86019	86019	S	0.79588
chr01	86085	86085	S	0.79588
chr01	86598	86598	S	0.508638
chr01	86850	86850	S	0.79588
chr01	86940	86940	S	0.79588
chr01	86964	86964	S	0.79588
chr01	87491	87491	S	0.79588
chr01	87549	87549	S	0.79588
chr01	87603	87603	S	0.79588
chr01	87609	87609	S	0.79588
chr01	87860	87860	S	0.79588
chr01	87912	87912	S	0.79588
chr01	88009	88009	S	0.508638
chr01	88213	88213	S	0.508638
chr01	88394	88394	S	0.508638
chr01	88639	88639	S	0.508638
chr01	88646	88646	S	0.508638
chr01	88746	88746	S	0.508638
chr01	90331	90331	S	0.508638
chr01	90388	90388	S	0.508638
chr01	90517	90517	S	0.508638
chr01	90666	90666	S	0.508638
chr01	90925	90925	S	0.508638
chr01	90982	90982	S	0.508638
chr01	91045	91045	S	0.508638
chr01	91174	91174	S	0.508638
chr01	91315	91315	S	0.508638
chr01	91666	91666	S	0.508638
chr01	91792	91792	S	0.508638
chr01	91903	91903	S	0.508638
chr01	91939	91939	S	0.508638
chr01	92065	92065	S	0.508638
chr01	92116	92116	S	0.508638
chr01	92369	92369	S	0.508638
chr01	92533	92533	S	0.508638
chr01	92550	92550	S	0.508638
chr01	92672	92672	S	0.508638
chr01	92680	92680	S	0.508638
chr01	92704	92704	S	0.508638
chr01	92720	92720	S	0.508638
chr01	92723	92723	S	0.508638
chr01	92892	92892	S	0.508638
chr01	92935	92935	S	0.508638
chr01	92942	92942	S	0.508638
chr01	92956	92956	S	0.508638
chr01	92984	92984	S	0.508638
chr01	93116	93116	S	0.508638
chr01	93185	93185	S	0.508638
chr01	93311	93311	S	0.508638
chr01	93320	93320	S	0.508638
chr01	93326	93326	S	0.508638
chr01	93564	93564	S	0.508638
chr01	93734	93734	S	0.508638
chr01	93746	93746	S	0.508638
chr01	93790	93790	S	0.508638
chr01	94286	94286	S	0.508638
chr01	94473	94473	S	0.508638
chr01	94683	94683	S	0.508638
chr01	94768	94768	S	0.508638
chr01	94864	94864	S	0.508638
chr01	94916	94916	S	0.508638
chr01	95019	95019	S	0.508638
chr01	95056	95056	S	0.79588
chr01	95140	95140	S	0.508638
chr01	95170	95170	S	0.508638
chr01	95191	95191	S	0.508638
chr01	95239	95239	S	0.508638
chr01	95282	95282	S	0.508638
chr01	95374	95374	S	0.508638
chr01	95377	95377	S	0.508638
chr01	95389	95389	S	0.508638
chr01	95392	95392	S	0.508638
chr01	95413	95413	S	0.508638
chr01	95449	95449	S	0.508638
chr01	95553	95553	S	0.508638
chr01	96048	96048	S	0.508638
chr01	96080	96080	S	0.508638
chr01	96093	96093	S	0.508638
chr01	97419	97419	S	0.508638
chr01	97596	97596	S	0.508638
chr01	97710	97710	S	0.508638
chr01	98420	98420	S	0.508638
chr01	98637	98637	S	0.508638
chr01	98886	98886	S	0.508638
chr01	99228	99228	S	0.508638
chr01	99441	99441	S	0.508638
chr01	99472	99472	S	0.508638
chr01	99607	99607	S	0.508638
chr01	99930	99930	S	0.508638
chr01	100001	100001	S	0.508638
chr01	100064	100064	S	0.508638
chr01	100274	100274	S	0.508638
chr01	100841	100841	S	0.30103
chr01	101178	101178	S	0.30103
chr01	101194	101194	S	0.30103
chr01	101199	101199	S	0.30103
chr01	101231	101231	S	0.30103
chr01	101564	101564	S	0.30103
chr01	101582	101582	S	0.30103
chr01	101608	101608	S	0.30103
chr01	101713	101713	S	0.30103
chr01	101992	101992	S	0.30103
chr01	102346	102346	S	0.30103
chr01	102349	102349	S	0.30103
chr01	102421	102421	S	0.30103
chr01	102484	102484	S	0.30103
chr01	102487	102487	S	0.30103
chr01	102607	102607	S	0.30103
chr01	102815	102815	S	0.30103
chr01	102865	102865	S	0.30103
chr01	102979	102979	S	0.508638
chr01	103069	103069	S	0.508638
chr01	103111	103111	S	0.508638
chr01	103142	103142	S	0.508638
chr01	103147	103147	S	0.508638
chr01	103308	103308	S	0.508638
chr01	103725	103725	S	0.30103
chr01	103900	103900	S	0.30103
chr01	104043	104043	S	0.30103
chr01	104470	104470	S	0.30103
chr01	105029	105029	S	0.30103
chr01	105801	105801	S	0.30103
chr01	106086	106086	S	0.30103
chr01	106105	106105	S	0.30103
chr01	106110	106110	S	0.30103
chr01	106138	106138	S	0.30103
chr01	106765	106765	S	0.30103
chr01	106990	106990	S	0.30103
chr01	107002	107002	S	0.30103
chr01	107029	107029	S	0.30103
chr01	107079	107079	S	0.30103
chr01	107320	107320	S	0.30103
chr01	107539	107539	S	0.508638
chr01	107971	107971	S	0.30103
chr01	108109	108109	S	0.508638
chr01	108392	108392	S	0.508638
chr01	108427	108427	S	0.508638
chr01	108582	108582	S	0.508638
chr01	108814	108814	S	0.508638
chr01	109448	109448	S	0.508638
chr01	109721	109721	S	0.508638
chr01	109736	109736	S	0.508638
chr01	109796	109796	S	0.508638
chr01	109888	109888	S	0.508638
chr01	110015	110015	S	0.508638
chr01	110102	110102	S	0.508638
chr01	110132	110132	S	0.508638
chr01	110857	110857	S	0.508638
chr01	110982	110982	S	0.508638
chr01	111181	111181	S	0.508638
chr01	111345	111345	S	0.508638
chr01	111402	111402	S	0.508638
chr01	111582	111582	S	0.508638
chr01	111656	111656	S	0.79588
chr01	111984	111984	S	0.508638
chr01	112118	112118	S	0.508638
chr01	112137	112137	S	0.508638
chr01	112185	112185	S	0.508638
chr01	112208	112208	S	0.508638
chr01	112233	112233	S	0.508638
chr01	112340	112340	S	0.508638
chr01	112374	112374	S	0.508638
chr01	112809	112809	S	0.508638
chr01	113208	113208	S	0.508638
chr01	113327	113327	S	0.508638
chr01	113790	113790	S	0.508638
chr01	113853	113853	S	0.508638
chr01	113858	113858	S	0.508638
chr01	113891	113891	S	0.508638
chr01	113908	113908	S	0.508638
chr01	114103	114103	S	0.508638
chr01	114134	114134	S	0.508638
chr01	114149	114149	S	0.508638
chr01	114320	114320	S	0.508638
chr01	114590	114590	S	0.79588
chr01	114653	114653	S	0.508638
chr01	114825	114825	S	0.508638
chr01	114929	114929	S	0.79588
chr01	115168	115168	S	0.508638
chr01	115340	115340	S	0.508638
chr01	115495	115495	S	0.508638
chr01	115513	115513	S	0.508638
chr01	115591	115591	S	0.508638
chr01	115786	115786	S	0.508638
chr01	115918	115918	S	0.30103
chr01	115975	115975	S	0.30103
chr01	115978	115978	S	0.30103
chr01	116202	116202	S	0.30103
chr01	116239	116239	S	0.30103
chr01	116328	116328	S	0.30103
chr01	116335	116335	S	0.30103
chr01	116341	116341	S	0.30103
chr01	116549	116549	S	0.508638
chr01	117370	117370	S	0.30103
chr01	117505	117505	S	0.30103
chr01	117511	117511	S	0.30103
chr01	117649	117649	S	0.30103
chr01	117670	117670	S	0.30103
chr01	117700	117700	S	0.30103
chr01	117941	117941	S	0.508638
chr01	118117	118117	S	0.30103
chr01	118144	118144	S	0.30103
chr01	118305	118305	S	0.30103
chr01	118541	118541	S	0.30103
chr01	118998	118998	S	0.30103
chr01	119351	119351	S	0.508638
chr01	119582	119582	S	0.508638
chr01	119822	119822	S	0.508638
chr01	120348	120348	S	0.508638
chr01	120379	120379	S	0.508638
chr01	120819	120819	S	0.508638
chr01	120912	120912	S	0.508638
chr01	121422	121422	S	0.508638
chr01	121454	121454	S	0.30103
chr01	121656	121656	S	0.30103
chr01	121908	121908	S	0.30103
chr01	121958	121958	S	0.30103
chr01	122046	122046	S	0.30103
chr01	122148	122148	S	0.30103
chr01	122183	122183	S	0.30103
chr01	122203	122203	S	0.30103
chr01	122332	122332	S	0.30103
chr01	122769	122769	S	0.508638
chr01	122796	122796	S	0.508638
chr01	122847	122847	S	0.508638
chr01	123009	123009	S	0.508638
chr01	123048	123048	S	0.508638
chr01	123075	123075	S	0.508638
chr01	123288	123288	S	0.508638
chr01	123718	123718	S	0.508638
chr01	123786	123786	S	0.508638
chr01	123843	123843	S	0.508638
chr01	123891	123891	S	0.508638
chr01	123984	123984	S	0.508638
chr01	124182	124182	S	0.508638
chr01	124368	124368	S	0.30103
chr01	124374	124374	S	0.30103
chr01	124568	124568	S	0.30103
chr01	124584	124584	S	0.30103
chr01	124647	124647	S	0.30103
chr01	124650	124650	S	0.30103
chr01	124658	124658	S	0.30103
chr01	124666	124666	S	0.30103
chr01	124672	124672	S	0.30103
chr01	124720	124720	S	0.30103
chr01	124805	124805	S	0.30103
chr01	124907	124907	S	0.30103
chr01	124951	124951	S	0.30103
chr01	124985	124985	S	0.30103
chr01	124987	124987	S	0.30103
chr01	125134	125134	S	0.30103
chr01	125308	125308	S	0.30103
chr01	125383	125383	S	0.30103
chr01	125611	125611	S	0.30103
chr01	126115	126115	S	0.30103
chr01	126259	126259	S	0.30103
chr01	126469	126469	S	0.30103
chr01	126484	126484	S	0.30103
chr01	126601	126601	S	0.30103
chr01	126898	126898	S	0.30103
chr01	126903	126903	S	0.30103
chr01	127228	127228	S	0.30103
chr01	127275	127275	S	0.30103
chr01	127411	127411	S	0.30103
chr01	127534	127534	S	0.30103
chr01	127882	127882	S	0.30103
chr01	127903	127903	S	0.30103
chr01	128053	128053	S	0.30103
chr01	128424	128424	S	0.508638
chr01	128456	128456	S	0.30103
chr01	128590	128590	S	0.30103
chr01	128757	128757	S	0.30103
chr01	131638	131638	S	0.30103
chr01	131845	131845	S	0.30103
chr01	132931	132931	S	0.30103
chr01	133083	133083	S	0.30103
chr01	133086	133086	S	0.30103
chr01	133137	133137	S	0.30103
chr01	135327	135327	S	0.30103
chr01	135342	135342	S	0.30103
chr01	135716	135716	S	0.30103
chr01	135954	135954	S	0.30103
chr01	136049	136049	S	0.30103
chr01	136162	136162	S	0.30103
chr01	141186	141186	S	0.30103
chr01	141986	141986	S	0.30103
chr01	142782	142782	I	0.30103
chr01	143087	143087	S	0.30103
chr01	143681	143681	S	0.30103
chr01	143824	143824	S	0.30103
chr01	143854	143854	S	0.30103
chr01	144828	144828	S	0.30103
chr01	145636	145636	S	0.30103
chr01	146541	146541	S	0.30103
chr01	147416	147416	S	0.30103
chr01	147509	147509	S	0.30103
chr01	147600	147600	S	0.30103
chr01	147657	147657	S	0.30103
chr01	147719	147719	S	0.30103
chr01	147728	147728	S	0.30103
chr01	147761	147761	S	0.30103
chr01	148148	148148	S	0.30103
chr01	148262	148262	S	0.30103
chr01	148888	148888	S	0.30103
chr01	149192	149192	S	0.30103
chr01	149240	149240	S	0.30103
chr01	149270	149270	S	0.30103
chr01	149309	149309	S	0.30103
chr01	149596	149596	S	0.30103
chr01	149775	149775	S	0.30103
chr01	149975	149975	S	0.30103
chr01	150305	150305	S	0.30103
chr01	150464	150464	S	0.30103
chr01	151012	151012	S	0.30103
chr01	151334	151335	M	0.30103
chr01	151774	151774	S	0.30103
chr01	151921	151921	S	0.30103
chr01	152235	152235	S	0.30103
chr01	152338	152338	S	0.30103
chr01	152730	152730	S	0.30103
chr01	153184	153184	S	0.30103
chr01	159624	159624	S	0.30103
chr01	159725	159725	S	0.30103
chr01	159758	159758	S	0.30103
chr01	159895	159895	S	0.508638
chr01	160076	160076	D	0.508638
chr01	160234	160271	D	0.508638
chr01	163426	163502	M	0.30103
chr01	163507	163515	D	0.30103
chr01	166098	166154	D	0.508638
chr01	166159	166175	M	0.508638
chr01	166179	166189	D	0.508638
chr01	168681	168681	S	0.508638
chr01	168762	168762	S	0.30103
chr01	168767	168767	S	0.30103
chr01	168782	168782	S	0.30103
chr01	169200	169200	S	0.30103
chr01	169212	169212	S	0.30103
chr01	169222	169222	I	0.30103
chr01	169264	169264	S	0.30103
chr01	169417	169417	S	0.30103
chr01	169471	169471	S	0.30103
chr01	169633	169633	S	0.30103
chr01	169684	169684	S	0.30103
chr01	169825	169825	S	0.30103
chr01	169882	169882	S	0.30103
chr01	169987	169987	S	0.30103
chr01	170017	170017	S	0.30103
chr01	170559	170559	S	0.30103
chr01	171384	171384	S	0.30103
chr01	173220	173220	S	0.508638
chr01	175304	175305	M	0.79588
chr01	175315	175315	S	0.79588
chr01	175351	175351	S	0.79588
chr01	175407	175407	S	0.79588
chr01	175571	175571	S	0.79588
chr01	175855	175855	D	0.79588
chr01	175961	175961	S	0.79588
chr01	175999	175999	S	0.79588
chr01	176000	176000	S	0.79588
chr01	176013	176013	S	0.79588
chr01	176167	176167	S	0.79588
chr01	176207	176207	S	0.79588
chr01	176218	176218	S	0.79588
chr01	176264	176264	S	1.1549
chr01	176269	176269	S	0.79588
chr01	176273	176273	S	0.79588
chr01	176278	176278	S	0.79588
chr01	176291	176291	S	0.79588
chr01	176302	176302	S	0.79588
chr01	176381	176381	S	0.79588
chr01	176429	176429	S	0.79588
chr01	177664	177664	S	0.79588
chr01	177723	177723	S	0.79588
chr01	177944	177944	S	0.79588
chr01	178127	178127	S	0.79588
chr01	178138	178138	S	0.79588
chr01	178352	178352	S	0.79588
chr01	178538	178538	S	0.79588
chr01	178560	178560	S	0.79588
chr01	178601	178601	D	0.79588
chr01	178614	178614	S	0.79588
chr01	178618	178618	I	0.79588
chr01	178749	178749	S	0.79588
chr01	178800	178800	S	0.79588
chr01	178824	178826	M	0.79588
chr01	178987	178987	S	0.79588
chr01	179049	179050	M	0.79588
chr01	179138	179138	I	1.1549
chr01	179153	179153	S	0.79588
chr01	179399	179399	S	0.79588
chr01	179535	179535	S	0.79588
chr01	179599	179599	S	0.79588
chr01	179607	179607	S	0.79588
chr01	179634	179636	M	0.79588
chr01	179665	179665	S	0.79588
chr01	179680	179680	I	0.79588
chr01	179681	179681	S	0.79588
chr01	179684	179684	I	0.79588
chr01	179685	179688	D	0.79588
chr01	179693	179693	S	0.79588
chr01	179697	179699	D	0.79588
chr01	179702	179702	D	0.79588
chr01	179705	179706	D	0.79588
chr01	179710	179710	I	0.79588
chr01	179712	179712	S	0.79588
chr01	179716	179716	S	0.79588
chr01	179718	179718	I	0.79588
chr01	179719	179719	S	0.79588
chr01	179727	179727	S	0.79588
chr01	179738	179738	S	0.79588
chr01	179743	179743	S	0.79588
chr01	179754	179754	S	0.79588
chr01	179759	179763	D	0.79588
chr01	179767	179767	S	0.79588
chr01	179769	179774	D	0.79588
chr01	179778	179778	D	0.79588
chr01	179783	179783	S	0.79588
chr01	179791	179791	D	0.79588
chr01	179792	179792	I	0.79588
chr01	179803	179803	D	0.79588
chr01	179811	179811	S	0.79588
chr01	179814	179814	S	0.79588
chr01	179821	179821	S	0.79588
chr01	179830	179830	S	0.79588
chr01	179834	179834	S	0.79588
chr01	179858	179858	D	0.79588
chr01	179860	179860	I	0.79588
chr01	179868	179869	M	0.79588
chr01	179874	179874	D	0.79588
chr01	179875	179875	S	0.79588
chr01	179888	179890	M	0.79588
chr01	179898	179898	S	0.79588
chr01	179905	179905	S	0.79588
chr01	179910	179910	D	0.79588
chr01	179913	179914	M	0.79588
chr01	179920	179920	S	0.79588
chr01	179923	179923	S	0.79588
chr01	179927	179927	S	0.79588
chr01	179930	179930	S	0.79588
chr01	179934	179934	S	0.79588
chr01	179939	179939	S	0.79588
chr01	179940	179940	S	0.79588
chr01	179949	179949	S	0.79588
chr01	179950	179950	S	0.79588
chr01	179953	179953	S	0.79588
chr01	179959	179959	S	0.79588
chr01	179964	179964	I	0.79588
chr01	179968	179970	M	0.79588
chr01	179974	179975	D	0.79588
chr01	179976	179976	S	0.79588
chr01	179980	179980	S	0.79588
chr01	179986	179986	S	0.79588
chr01	179989	179990	M	0.79588
chr01	179994	179994	S	0.79588
chr01	179996	179996	S	0.79588
chr01	180009	180009	S	0.79588
chr01	180012	180012	S	0.79588
chr01	180016	180016	S	0.79588
chr01	180023	180023	S	0.79588
chr01	180026	180026	S	0.79588
chr01	180032	180032	I	0.79588
chr01	180036	180038	M	0.79588
chr01	180047	180047	S	0.79588
chr01	180054	180054	S	0.79588
chr01	180063	180063	S	0.79588
chr01	180082	180082	S	0.79588
chr01	180084	180086	M	0.79588
chr01	180088	180088	I	0.79588
chr01	180092	180092	I	0.79588
chr01	180094	180094	S	0.79588
chr01	180100	180100	S	0.79588
chr01	180109	180109	D	0.79588
chr01	180115	180116	D	0.79588
chr01	180120	180120	I	0.79588
chr01	180122	180122	I	0.79588
chr01	180125	180125	S	0.79588
chr01	180129	180132	D	0.79588
chr01	180142	180142	S	0.79588
chr01	180154	180154	S	0.79588
chr01	180162	180162	I	0.79588
chr01	180164	180164	I	0.79588
chr01	180166	180166	I	0.79588
chr01	180168	180168	I	0.79588
chr01	180170	180170	I	0.79588
chr01	180174	180174	I	0.79588
chr01	180176	180176	I	0.79588
chr01	180180	180180	I	0.79588
chr01	180182	180182	I	0.79588
chr01	180182	180182	I	0.79588
chr01	180184	180184	I	0.79588
chr01	180186	180186	I	0.79588
chr01	180189	180190	D	0.79588
chr01	180190	180190	I	0.79588
chr01	180194	180194	I	0.79588
chr01	180196	180196	I	0.79588
chr01	180198	180198	I	0.79588
chr01	180200	180200	I	0.79588
chr01	180204	180204	I	0.79588
chr01	180206	180206	M	0.79588
chr01	180208	180208	I	0.79588
chr01	180212	180212	I	0.79588
chr01	180216	180218	M	0.79588
chr01	180221	180222	M	0.79588
chr01	180224	180224	I	0.79588
chr01	180236	180238	M	0.79588
chr01	180242	180242	I	0.79588
chr01	180244	180244	I	0.79588
chr01	180246	180246	I	0.79588
chr01	180247	180247	S	0.79588
chr01	180252	180254	M	0.79588
chr01	180258	180258	I	0.79588
chr01	180260	180262	M	0.79588
chr01	180264	180264	I	0.79588
chr01	180268	180270	M	0.79588
chr01	180272	180274	M	0.79588
chr01	180276	180276	I	0.79588
chr01	180280	180280	I	0.79588
chr01	180284	180284	I	0.79588
chr01	180290	180290	I	0.79588
chr01	180292	180294	M	1.1549
chr01	180296	180298	M	0.79588
chr01	180300	180302	M	0.79588
chr01	180304	180304	I	0.79588
chr01	180308	180308	I	0.79588
chr01	180310	180310	I	0.79588
chr01	180314	180314	I	0.79588
chr01	180316	180316	I	0.79588
chr01	180316	180316	I	0.79588
chr01	180318	180318	I	0.79588
chr01	180326	180326	S	0.79588
chr01	180330	180330	S	0.79588
chr01	180336	180336	S	0.79588
chr01	180343	180343	S	0.79588
chr01	180356	180358	M	0.79588
chr01	180369	180369	S	0.79588
chr01	180379	180379	S	0.79588
chr01	180388	180390	M	0.79588
chr01	180393	180393	S	0.79588
chr01	180399	180399	S	0.79588
chr01	180405	180405	S	0.79588
chr01	180414	180414	D	0.79588
chr01	180416	180416	I	0.79588
chr01	180417	180418	D	0.79588
chr01	180420	180420	I	0.79588
chr01	180424	180424	S	0.79588
chr01	180428	180428	D	0.79588
chr01	180430	180430	I	0.79588
chr01	180436	180438	D	0.79588
chr01	180440	180440	I	0.79588
chr01	180451	180451	S	0.79588
chr01	180466	180466	S	0.79588
chr01	180471	180471	S	0.79588
chr01	180473	180473	S	0.79588
chr01	180479	180479	S	0.79588
chr01	180498	180498	I	0.79588
chr01	180500	180500	I	0.79588
chr01	180504	180504	I	0.79588
chr01	180504	180504	I	0.79588
chr01	180506	180506	I	0.79588
chr01	180508	180508	I	0.79588
chr01	180510	180510	I	0.79588
chr01	180510	180510	I	0.79588
chr01	180512	180512	I	0.79588
chr01	180514	180514	I	0.79588
chr01	180516	180516	I	0.79588
chr01	180518	180518	I	0.79588
chr01	180520	180520	I	0.79588
chr01	180520	180520	I	0.79588
chr01	180522	180522	I	0.79588
chr01	180524	180524	I	0.79588
chr01	180530	180530	S	0.79588
chr01	180539	180539	S	0.79588
chr01	180543	180543	S	0.79588
chr01	180549	180549	S	0.79588
chr01	180552	180552	S	0.79588
chr01	180560	180560	S	0.79588
chr01	180568	180568	S	0.79588
chr01	180573	180573	S	0.79588
chr01	180583	180583	S	0.79588
chr01	180590	180590	S	0.79588
chr01	180595	180595	S	0.79588
chr01	180598	180598	S	0.79588
chr01	180600	180600	I	0.79588
chr01	180604	180606	D	0.79588
chr01	180615	180617	D	0.79588
chr01	180618	180618	I	0.79588
chr01	180623	180623	S	0.79588
chr01	180629	180629	S	0.79588
chr01	180631	180631	S	0.79588
chr01	180634	180635	D	0.79588
chr01	180636	180636	I	0.79588
chr01	180644	180645	M	0.79588
chr01	180656	180656	I	0.79588
chr01	180657	180657	S	0.79588
chr01	180659	180659	S	0.79588
chr01	180662	180662	I	0.79588
chr01	180663	180665	D	0.79588
chr01	180669	180669	S	0.79588
chr01	180671	180671	S	0.79588
chr01	180674	180674	D	0.79588
chr01	180676	180676	I	0.79588
chr01	180681	180681	S	0.79588
chr01	180685	180685	S	0.79588
chr01	180700	180700	S	0.79588
chr01	180702	180702	S	0.79588
chr01	180707	180707	S	0.79588
chr01	180715	180715	S	0.79588
chr01	180717	180717	S	0.79588
chr01	180722	180722	D	0.79588
chr01	180726	180726	S	0.79588
chr01	180727	180727	S	0.79588
chr01	180735	180735	S	0.79588
chr01	180737	180737	S	0.79588
chr01	180742	180742	S	0.79588
chr01	180745	180745	S	0.79588
chr01	180748	180748	S	0.79588
chr01	180751	180752	D	0.79588
chr01	180754	180754	D	0.79588
chr01	180756	180756	I	0.79588
chr01	180765	180765	S	0.79588
chr01	180769	180769	D	0.79588
chr01	180774	180774	S	0.79588
chr01	180783	180785	D	0.79588
chr01	180790	180790	I	0.79588
chr01	180793	180793	S	0.79588
chr01	180798	180798	S	0.79588
chr01	180802	180802	S	0.79588
chr01	180805	180806	D	0.79588
chr01	180816	180816	S	0.79588
chr01	180820	180820	S	0.79588
chr01	180830	180830	I	0.79588
chr01	180835	180835	D	0.79588
chr01	180838	180838	S	0.79588
chr01	180842	180842	I	0.79588
chr01	180849	180850	M	0.79588
chr01	180868	180868	S	0.79588
chr01	180870	180871	D	0.79588
chr01	180874	180874	I	0.79588
chr01	180876	180877	D	0.79588
chr01	180880	180883	M	0.79588
chr01	180886	180889	D	0.79588
chr01	180892	180897	D	0.79588
chr01	180900	180911	D	0.79588
chr01	180919	180929	D	0.79588
chr01	180931	180931	D	0.79588
chr01	180933	180934	D	0.79588
chr01	180938	180938	I	0.79588
chr01	180941	180945	D	0.79588
chr01	180950	180951	D	0.79588
chr01	180953	180976	D	0.79588
chr01	180980	180982	D	0.79588
chr01	180985	180985	D	0.79588
chr01	180989	181005	D	0.79588
chr01	181009	181011	D	0.79588
chr01	181013	181023	D	0.79588
chr01	181026	181033	D	0.79588
chr01	181038	181042	D	0.79588
chr01	181046	181046	D	0.79588
chr01	181048	181051	D	0.79588
chr01	181055	181062	D	0.79588
chr01	181065	181069	D	0.79588
chr01	181072	181072	D	0.79588
chr01	181074	181076	D	0.79588
chr01	181079	181079	D	0.79588
chr01	181082	181085	D	0.79588
chr01	181087	181087	D	0.79588
chr01	181089	181089	D	0.79588
chr01	181095	181100	D	0.79588
chr01	181103	181116	D	0.79588
chr01	181122	181122	S	0.79588
chr01	181272	181273	M	0.79588
chr01	181281	181281	S	0.79588
chr01	181286	181286	S	0.79588
chr01	181287	181287	S	0.79588
chr01	181290	181290	S	0.79588
chr01	181298	181298	I	0.79588
chr01	181299	181300	D	0.79588
chr01	181304	181304	I	0.79588
chr01	181304	181304	S	0.79588
chr01	181306	181306	S	0.79588
chr01	181311	181312	D	0.79588
chr01	181318	181318	S	0.79588
chr01	181319	181319	S	0.79588
chr01	181323	181325	D	0.79588
chr01	181326	181326	I	0.79588
chr01	181328	181329	M	0.79588
chr01	181339	181339	S	0.79588
chr01	181342	181342	S	0.79588
chr01	181348	181348	I	0.79588
chr01	181351	181353	D	0.79588
chr01	181357	181357	S	0.79588
chr01	181358	181358	I	0.79588
chr01	181362	181362	D	0.79588
chr01	181364	181364	S	0.79588
chr01	181370	181370	I	0.79588
chr01	181372	181372	D	0.79588
chr01	181375	181375	S	0.79588
chr01	181379	181380	D	0.79588
chr01	181382	181382	I	0.79588
chr01	181390	181390	I	0.79588
chr01	181396	181396	I	0.79588
chr01	181400	181400	I	0.79588
chr01	181401	181401	D	0.79588
chr01	181404	181404	I	0.79588
chr01	181406	181406	I	0.79588
chr01	181410	181410	I	0.79588
chr01	181415	181415	D	0.79588
chr01	181416	181416	I	0.79588
chr01	181423	181423	S	0.79588
chr01	181426	181426	S	0.79588
chr01	181433	181433	S	0.79588
chr01	181435	181435	D	0.79588
chr01	181438	181438	I	0.79588
chr01	181443	181443	S	0.79588
chr01	181446	181446	S	0.79588
chr01	181454	181454	S	0.79588
chr01	181457	181457	S	0.79588
chr01	181464	181464	S	0.79588
chr01	181468	181468	S	0.79588
chr01	181478	181478	S	0.79588
chr01	181484	181486	M	0.79588
chr01	181498	181498	S	0.79588
chr01	181501	181501	S	0.79588
chr01	181510	181510	I	0.79588
chr01	181516	181517	D	0.79588
chr01	181520	181520	D	0.79588
chr01	181523	181523	S	0.79588
chr01	181524	181526	M	0.79588
chr01	181536	181538	M	0.79588
chr01	181542	181542	S	0.79588
chr01	181549	181549	S	0.79588
chr01	181554	181554	S	0.79588
chr01	181558	181558	S	0.79588
chr01	181570	181570	I	0.79588
chr01	181576	181576	I	0.79588
chr01	181577	181577	S	0.79588
chr01	181583	181583	S	0.79588
chr01	181589	181589	D	0.79588
chr01	181591	181591	S	0.79588
chr01	181598	181598	I	0.79588
chr01	181601	181601	D	0.79588
chr01	181604	181604	I	0.79588
chr01	181610	181611	D	0.79588
chr01	181612	181612	I	0.79588
chr01	181614	181614	I	0.79588
chr01	181618	181618	I	0.79588
chr01	181619	181619	S	0.79588
chr01	181629	181629	S	0.79588
chr01	181643	181643	S	0.79588
chr01	181650	181650	S	0.79588
chr01	181652	181652	S	0.79588
chr01	181658	181658	I	0.79588
chr01	181667	181667	S	0.79588
chr01	181672	181673	M	0.79588
chr01	181682	181682	M	0.79588
chr01	181686	181687	D	0.79588
chr01	181690	181690	I	0.79588
chr01	181693	181694	M	0.79588
chr01	181700	181702	M	0.79588
chr01	181703	181703	D	0.79588
chr01	181711	181711	S	0.79588
chr01	181714	181714	I	0.79588
chr01	181717	181717	D	0.79588
chr01	181719	181720	D	0.79588
chr01	181724	181724	I	0.79588
chr01	181725	181725	S	0.79588
chr01	181738	181738	S	0.79588
chr01	181743	181743	S	0.79588
chr01	181746	181747	D	0.79588
chr01	181749	181749	D	0.79588
chr01	181753	181754	D	0.79588
chr01	181758	181759	D	0.79588
chr01	181761	181761	D	0.79588
chr01	181766	181766	I	0.79588
chr01	181771	181771	S	0.79588
chr01	181772	181772	S	0.79588
chr01	181777	181777	S	0.79588
chr01	181785	181785	D	0.79588
chr01	181787	181787	D	0.79588
chr01	181788	181788	I	0.79588
chr01	181792	181792	I	0.79588
chr01	181796	181796	S	0.79588
chr01	181800	181801	M	0.79588
chr01	181806	181806	I	0.79588
chr01	181809	181809	S	0.79588
chr01	181814	181814	S	0.79588
chr01	181818	181818	S	0.79588
chr01	181821	181822	M	0.79588
chr01	181834	181834	S	0.79588
chr01	181840	181841	M	0.79588
chr01	181844	181846	M	0.79588
chr01	181848	181848	S	0.79588
chr01	181853	181853	S	0.79588
chr01	181862	181862	S	0.79588
chr01	181875	181875	D	0.79588
chr01	181878	181878	I	0.79588
chr01	181879	181879	S	0.79588
chr01	181887	181887	S	0.79588
chr01	181893	181893	S	0.79588
chr01	181896	181897	M	0.79588
chr01	181916	181917	M	0.79588
chr01	181922	181922	D	0.79588
chr01	181933	181933	S	0.79588
chr01	181936	181937	M	0.79588
chr01	181945	181947	D	0.79588
chr01	181950	181950	I	0.79588
chr01	181953	181953	S	0.79588
chr01	181964	181967	D	0.79588
chr01	181968	181968	I	0.79588
chr01	181970	181970	I	0.79588
chr01	181970	181970	S	0.79588
chr01	181977	181977	S	0.79588
chr01	181986	181986	I	0.79588
chr01	181992	181992	D	0.79588
chr01	181994	181994	D	0.79588
chr01	182010	182010	S	0.79588
chr01	182012	182012	I	0.79588
chr01	182014	182014	I	0.79588
chr01	182014	182014	I	0.79588
chr01	182016	182016	I	0.79588
chr01	182020	182020	M	0.79588
chr01	182022	182022	I	0.79588
chr01	182024	182024	I	0.79588
chr01	182026	182026	I	0.79588
chr01	182026	182026	I	0.79588
chr01	182028	182028	I	0.79588
chr01	182032	182032	I	0.79588
chr01	182034	182034	S	0.79588
chr01	182036	182036	I	0.79588
chr01	182038	182038	I	0.79588
chr01	182040	182040	S	0.79588
chr01	182042	182042	I	0.79588
chr01	182044	182044	I	0.79588
chr01	182046	182046	I	0.79588
chr01	182048	182048	I	0.79588
chr01	182050	182050	I	0.79588
chr01	182052	182052	I	0.79588
chr01	182054	182054	I	0.79588
chr01	182054	182054	I	0.79588
chr01	182056	182056	I	0.79588
chr01	182060	182060	I	0.79588
chr01	182062	182062	I	0.79588
chr01	182066	182066	I	0.79588
chr01	182066	182066	I	0.79588
chr01	182072	182072	I	0.79588
chr01	182074	182074	I	0.79588
chr01	182076	182076	I	0.79588
chr01	182086	182086	S	0.79588
chr01	182087	182087	S	0.79588
chr01	182096	182097	M	0.79588
chr01	182101	182101	S	0.79588
chr01	182103	182103	S	0.79588
chr01	182114	182114	S	0.79588
chr01	182119	182119	S	0.79588
chr01	182126	182126	D	0.79588
chr01	182130	182130	S	0.79588
chr01	182132	182132	I	0.79588
chr01	182135	182135	D	0.79588
chr01	182136	182137	M	0.79588
chr01	182140	182140	S	0.79588
chr01	182144	182144	S	0.79588
chr01	182151	182151	S	0.79588
chr01	182156	182158	M	0.79588
chr01	182160	182160	S	0.79588
chr01	182163	182163	S	0.79588
chr01	182177	182178	D	0.79588
chr01	182181	182181	D	0.79588
chr01	182183	182183	S	0.79588
chr01	182186	182186	S	0.79588
chr01	182188	182188	I	0.79588
chr01	182189	182190	D	0.79588
chr01	182193	182193	S	0.79588
chr01	182198	182198	S	0.79588
chr01	182204	182204	S	0.79588
chr01	182207	182207	S	0.79588
chr01	182210	182210	S	0.79588
chr01	182214	182214	S	0.79588
chr01	182227	182227	S	0.79588
chr01	182230	182230	M	0.79588
chr01	182257	182257	S	0.79588
chr01	182268	182268	S	0.79588
chr01	182274	182274	I	0.79588
chr01	182275	182275	D	0.79588
chr01	182277	182277	D	0.79588
chr01	182283	182283	D	0.79588
chr01	182284	182284	I	0.79588
chr01	182289	182289	S	0.79588
chr01	182298	182298	S	0.79588
chr01	182305	182305	S	0.79588
chr01	182321	182321	S	0.79588
chr01	182329	182329	S	0.79588
chr01	182336	182336	S	0.79588
chr01	182353	182353	S	0.79588
chr01	182361	182362	M	0.79588
chr01	182371	182371	S	0.79588
chr01	182375	182375	D	0.79588
chr01	182376	182377	M	0.79588
chr01	182390	182390	S	0.79588
chr01	182391	182391	S	0.79588
chr01	182399	182399	D	0.79588
chr01	182402	182402	I	0.79588
chr01	182420	182420	D	0.79588
chr01	182429	182429	S	0.79588
chr01	182433	182433	S	0.79588
chr01	182450	182450	S	0.79588
chr01	182454	182455	D	0.79588
chr01	182456	182456	I	0.79588
chr01	182460	182462	M	0.79588
chr01	182466	182466	D	0.79588
chr01	182472	182472	S	0.79588
chr01	182475	182475	S	0.79588
chr01	182484	182484	S	0.79588
chr01	182488	182489	M	0.79588
chr01	182494	182494	D	0.79588
chr01	182497	182497	S	0.79588
chr01	182504	182504	I	0.79588
chr01	182598	182598	I	0.79588
chr01	182603	182609	M	0.79588
chr01	182613	182624	D	0.79588
chr01	182627	182637	D	0.79588
chr01	182640	182646	M	0.79588
chr01	182648	182649	D	0.79588
chr01	182651	182664	M	0.79588
chr01	182668	182678	M	0.79588
chr01	182680	182685	D	0.79588
chr01	182689	182692	D	0.79588
chr01	182697	182702	D	0.79588
chr01	182704	182711	D	0.79588
chr01	182713	182713	D	0.79588
chr01	182714	182714	I	0.79588
chr01	182718	182723	D	0.79588
chr01	182728	182733	D	0.79588
chr01	182735	182741	D	0.79588
chr01	182744	182751	D	0.79588
chr01	182760	182766	M	0.79588
chr01	182770	182778	M	0.79588
chr01	182780	182781	D	0.79588
chr01	182783	182786	D	0.79588
chr01	182789	182789	D	0.79588
chr01	182792	182804	M	0.79588
chr01	182806	182806	I	0.79588
chr01	182810	182818	D	0.79588
chr01	182823	182846	M	0.79588
chr01	182849	182853	M	0.79588
chr01	182858	182858	D	0.79588
chr01	182932	182933	D	0.79588
chr01	182936	182951	D	0.79588
chr01	182957	182958	D	0.79588
chr01	182962	182978	D	0.79588
chr01	182982	182984	D	0.79588
chr01	182987	183001	D	0.79588
chr01	183003	183003	D	0.79588
chr01	183006	183006	D	0.79588
chr01	183008	183008	D	0.79588
chr01	183012	183022	D	0.79588
chr01	183027	183038	D	0.79588
chr01	183040	183043	D	0.79588
chr01	183045	183045	D	0.79588
chr01	183047	183047	D	0.79588
chr01	183051	183060	D	0.79588
chr01	183065	183065	D	0.79588
chr01	183067	183071	D	0.79588
chr01	183073	183077	D	0.79588
chr01	183083	183132	D	0.79588
chr01	183146	183146	S	0.79588
chr01	183462	183465	M	0.79588
chr01	183468	183471	D	0.79588
chr01	183474	183482	M	0.79588
chr01	183484	183486	M	0.79588
chr01	183491	183491	D	0.79588
chr01	183493	183496	D	0.79588
chr01	183500	183501	D	0.79588
chr01	183503	183507	M	0.79588
chr01	183511	183514	M	0.79588
chr01	183518	183519	D	0.79588
chr01	183522	183525	D	0.79588
chr01	183527	183527	D	0.79588
chr01	183529	183532	D	0.79588
chr01	183534	183535	D	0.79588
chr01	183540	183540	I	0.79588
chr01	183542	183542	I	0.79588
chr01	183542	183542	I	0.79588
chr01	183547	183558	D	0.79588
chr01	183561	183568	D	0.79588
chr01	183570	183570	I	0.79588
chr01	183576	183576	I	0.79588
chr01	183579	183580	D	0.79588
chr01	183584	183586	M	0.79588
chr01	183590	183592	D	0.79588
chr01	183601	183601	D	0.79588
chr01	183614	183614	D	0.79588
chr01	183616	183616	I	0.79588
chr01	183620	183620	M	0.79588
chr01	183623	183629	D	0.79588
chr01	183634	183642	D	0.79588
chr01	183647	183651	M	0.79588
chr01	183654	183654	S	0.79588
chr01	183657	183662	D	0.79588
chr01	183666	183666	I	0.79588
chr01	183670	183676	D	0.79588
chr01	183680	183681	D	0.79588
chr01	183683	183683	D	0.79588
chr01	183685	183687	D	0.79588
chr01	183690	183690	I	0.79588
chr01	183694	183694	I	0.79588
chr01	183695	183695	D	0.79588
chr01	183700	183700	S	0.79588
chr01	183702	183702	S	0.79588
chr01	183704	183704	I	0.79588
chr01	183707	183707	D	0.79588
chr01	183711	183711	S	0.79588
chr01	183716	183718	M	0.79588
chr01	183721	183721	S	0.79588
chr01	183724	183726	M	0.79588
chr01	183730	183730	S	0.79588
chr01	183735	183735	D	0.79588
chr01	183738	183738	I	0.79588
chr01	183740	183740	S	0.79588
chr01	183750	183753	M	0.79588
chr01	183755	183755	D	0.79588
chr01	183760	183762	M	0.79588
chr01	183783	183785	M	0.79588
chr01	183803	183809	M	0.79588
chr01	183859	183859	S	0.79588
chr01	183866	183866	S	0.79588
chr01	183867	183867	S	0.79588
chr01	183874	183874	S	0.79588
chr01	183884	183886	M	0.79588
chr01	183888	183890	M	0.79588
chr01	183892	183892	S	0.79588
chr01	183895	183895	S	0.79588
chr01	183898	183898	S	0.79588
chr01	183903	183903	S	0.79588
chr01	183906	183906	S	0.79588
chr01	183913	183915	D	0.79588
chr01	183919	183919	S	0.79588
chr01	183920	183920	I	0.79588
chr01	183926	183926	S	0.79588
chr01	183927	183927	S	0.79588
chr01	183930	183930	S	0.79588
chr01	183935	183935	S	0.79588
chr01	183939	183939	S	0.79588
chr01	183941	183941	S	0.79588
chr01	183947	183947	S	0.79588
chr01	183954	183954	S	0.79588
chr01	183959	183960	D	0.79588
chr01	183962	183962	I	0.79588
chr01	183977	183978	M	0.79588
chr01	183988	183988	I	0.79588
chr01	183991	183991	D	0.79588
chr01	183994	183994	I	0.79588
chr01	183996	183997	D	0.79588
chr01	184003	184003	S	0.79588
chr01	184006	184006	S	0.79588
chr01	184010	184010	S	0.79588
chr01	184015	184015	S	0.79588
chr01	184037	184037	S	0.79588
chr01	184042	184042	I	0.79588
chr01	184044	184044	I	0.79588
chr01	184046	184046	I	0.79588
chr01	184048	184048	I	0.79588
chr01	184049	184050	D	0.79588
chr01	184053	184053	D	0.79588
chr01	184055	184059	D	0.79588
chr01	184065	184065	S	0.79588
chr01	184067	184067	S	0.79588
chr01	184074	184074	S	0.79588
chr01	184077	184077	S	0.79588
chr01	184079	184080	D	0.79588
chr01	184082	184082	I	0.79588
chr01	184094	184094	S	0.79588
chr01	184106	184106	S	0.79588
chr01	184126	184126	S	0.79588
chr01	184141	184141	S	0.79588
chr01	184150	184152	D	0.79588
chr01	184152	184152	I	0.79588
chr01	184162	184162	S	0.79588
chr01	184165	184165	S	0.79588
chr01	184171	184171	S	0.79588
chr01	184177	184177	S	0.79588
chr01	184181	184181	D	0.79588
chr01	184184	184185	M	0.79588
chr01	184190	184191	D	0.79588
chr01	184192	184192	I	0.79588
chr01	184208	184208	S	0.79588
chr01	184229	184229	S	0.79588
chr01	184250	184250	S	0.79588
chr01	184254	184254	I	0.79588
chr01	184257	184257	D	0.79588
chr01	184267	184267	S	0.79588
chr01	184268	184268	S	0.79588
chr01	184274	184274	S	0.79588
chr01	184275	184275	S	0.79588
chr01	184279	184279	S	0.79588
chr01	184280	184282	M	0.79588
chr01	184307	184318	D	0.79588
chr01	184326	184326	I	0.79588
chr01	184328	184328	D	0.79588
chr01	184336	184336	S	0.79588
chr01	184342	184342	I	0.79588
chr01	184343	184343	D	0.79588
chr01	184345	184345	S	0.79588
chr01	184347	184347	S	0.79588
chr01	184352	184352	S	0.79588
chr01	184360	184360	S	0.79588
chr01	184363	184363	S	0.79588
chr01	184372	184372	S	0.79588
chr01	184390	184390	S	0.79588
chr01	184391	184391	S	0.79588
chr01	184394	184394	S	0.79588
chr01	184412	184412	S	0.79588
chr01	184424	184424	S	0.79588
chr01	184457	184457	S	0.79588
chr01	184459	184459	S	0.79588
chr01	184475	184475	S	0.79588
chr01	184479	184479	S	0.79588
chr01	184483	184483	S	0.79588
chr01	184486	184486	S	0.79588
chr01	184505	184505	S	0.79588
chr01	184514	184514	S	0.79588
chr01	184516	184516	I	0.79588
chr01	184520	184520	I	0.79588
chr01	184523	184528	D	0.79588
chr01	184529	184529	S	0.79588
chr01	184541	184542	D	0.79588
chr01	184544	184544	I	0.79588
chr01	184548	184548	I	0.79588
chr01	184551	184551	S	0.79588
chr01	184552	184552	I	0.79588
chr01	184554	184554	I	0.79588
chr01	184560	184560	I	0.79588
chr01	184561	184561	S	0.79588
chr01	184565	184566	D	0.79588
chr01	184569	184571	D	0.79588
chr01	184573	184573	D	0.79588
chr01	184576	184580	D	0.79588
chr01	184582	184582	I	0.79588
chr01	184586	184586	D	0.79588
chr01	184590	184590	D	0.79588
chr01	184592	184592	I	0.79588
chr01	184592	184592	I	0.79588
chr01	184596	184596	D	0.79588
chr01	184598	184598	I	0.79588
chr01	184601	184607	D	0.79588
chr01	184609	184609	S	0.79588
chr01	184612	184612	I	0.79588
chr01	184614	184614	I	0.79588
chr01	184616	184618	M	0.79588
chr01	184621	184621	S	0.79588
chr01	184623	184623	S	0.79588
chr01	184624	184624	S	0.79588
chr01	184626	184626	I	0.79588
chr01	184628	184628	I	0.79588
chr01	184633	184633	S	0.79588
chr01	184636	184636	I	0.79588
chr01	184636	184636	S	0.79588
chr01	184638	184639	D	0.79588
chr01	184642	184642	I	0.79588
chr01	184652	184652	M	0.79588
chr01	184656	184657	D	0.79588
chr01	184661	184661	S	0.79588
chr01	184662	184662	I	0.79588
chr01	184664	184666	M	0.79588
chr01	184670	184673	D	0.79588
chr01	184676	184676	I	0.79588
chr01	184680	184680	I	0.79588
chr01	184682	184682	I	0.79588
chr01	184684	184684	I	0.79588
chr01	184686	184686	I	0.79588
chr01	184687	184687	S	0.79588
chr01	184690	184690	D	0.79588
chr01	184692	184692	S	0.79588
chr01	184696	184696	I	0.79588
chr01	184698	184698	S	0.79588
chr01	184700	184700	I	0.79588
chr01	184702	184702	S	0.79588
chr01	184707	184708	D	0.79588
chr01	184710	184714	D	0.79588
chr01	184715	184715	S	0.79588
chr01	184718	184718	S	0.79588
chr01	184725	184725	S	0.79588
chr01	184729	184729	S	0.79588
chr01	184733	184733	S	0.79588
chr01	184735	184735	S	0.79588
chr01	184738	184739	M	0.79588
chr01	184744	184744	S	0.79588
chr01	184746	184746	I	0.79588
chr01	184747	184747	S	0.79588
chr01	184753	184753	D	0.79588
chr01	184756	184756	D	0.79588
chr01	184758	184758	S	0.79588
chr01	184761	184761	D	0.79588
chr01	184771	184771	D	0.79588
chr01	184774	184774	I	0.79588
chr01	184775	184775	S	0.79588
chr01	184784	184784	D	0.79588
chr01	184788	184790	M	0.79588
chr01	184794	184794	I	0.79588
chr01	184794	184794	I	0.79588
chr01	184796	184796	I	0.79588
chr01	184798	184799	D	0.79588
chr01	184800	184800	I	0.79588
chr01	184802	184802	S	0.79588
chr01	184804	184804	I	0.79588
chr01	184808	184808	I	0.79588
chr01	184812	184812	I	0.79588
chr01	184814	184814	I	0.79588
chr01	184814	184814	I	0.79588
chr01	184818	184818	I	0.79588
chr01	184820	184820	I	0.79588
chr01	184823	184827	D	0.79588
chr01	184831	184832	D	0.79588
chr01	184833	184833	S	0.79588
chr01	184840	184840	I	0.79588
chr01	184842	184842	D	0.79588
chr01	184850	184850	I	0.79588
chr01	184852	184852	D	0.79588
chr01	184854	184854	I	0.79588
chr01	184858	184859	D	0.79588
chr01	184860	184860	I	0.79588
chr01	184863	184863	D	0.79588
chr01	184867	184868	D	0.79588
chr01	184870	184870	I	0.79588
chr01	184874	184874	D	0.79588
chr01	184876	184876	I	0.79588
chr01	184876	184876	I	0.79588
chr01	184878	184878	I	0.79588
chr01	184883	184883	D	0.79588
chr01	184884	184884	S	0.79588
chr01	184889	184889	S	0.79588
chr01	184895	184895	S	0.79588
chr01	184898	184898	S	0.79588
chr01	184901	184901	S	0.79588
chr01	184908	184910	D	0.79588
chr01	184914	184914	I	0.79588
chr01	184918	184918	S	0.79588
chr01	184920	184920	I	0.79588
chr01	184927	184927	S	0.79588
chr01	184931	184931	D	0.79588
chr01	184932	184933	M	0.79588
chr01	184941	184941	S	0.79588
chr01	184948	184948	S	0.79588
chr01	184957	184957	S	0.79588
chr01	184960	184960	S	0.79588
chr01	184968	184968	S	0.79588
chr01	184973	184974	M	0.79588
chr01	184976	184976	S	0.79588
chr01	184978	184978	I	0.79588
chr01	184983	184983	S	0.79588
chr01	184989	184989	S	0.79588
chr01	184994	184994	S	0.79588
chr01	185004	185004	I	0.79588
chr01	185008	185009	D	0.79588
chr01	185011	185011	S	0.79588
chr01	185014	185014	S	0.79588
chr01	185019	185019	S	0.79588
chr01	185020	185020	S	0.79588
chr01	185026	185026	S	0.79588
chr01	185030	185030	I	0.79588
chr01	185034	185037	D	0.79588
chr01	185045	185046	M	0.79588
chr01	185048	185048	D	0.79588
chr01	185051	185052	D	0.79588
chr01	185054	185054	D	0.79588
chr01	185056	185057	D	0.79588
chr01	185059	185059	S	0.79588
chr01	185062	185062	I	0.79588
chr01	185068	185068	I	0.79588
chr01	185068	185068	S	0.79588
chr01	185072	185072	I	0.79588
chr01	185074	185074	I	0.79588
chr01	185076	185077	M	0.79588
chr01	185081	185084	D	0.79588
chr01	185090	185090	D	0.79588
chr01	185097	185098	D	0.79588
chr01	185100	185100	I	0.79588
chr01	185101	185104	D	0.79588
chr01	185106	185106	I	0.79588
chr01	185108	185108	I	0.79588
chr01	185110	185110	I	0.79588
chr01	185113	185113	S	0.79588
chr01	185114	185114	I	0.79588
chr01	185118	185118	I	0.79588
chr01	185123	185123	S	0.79588
chr01	185126	185126	I	0.79588
chr01	185127	185129	D	0.79588
chr01	185132	185132	I	0.79588
chr01	185134	185134	I	0.79588
chr01	185137	185140	D	0.79588
chr01	185140	185140	I	0.79588
chr01	185143	185144	D	0.79588
chr01	185152	185152	I	0.79588
chr01	185154	185154	D	0.79588
chr01	185156	185158	M	0.79588
chr01	185162	185163	D	0.79588
chr01	185165	185165	S	0.79588
chr01	185166	185166	S	0.79588
chr01	185170	185170	D	0.79588
chr01	185172	185172	D	0.79588
chr01	185174	185174	I	0.79588
chr01	185177	185178	D	0.79588
chr01	185179	185179	S	0.79588
chr01	185183	185183	S	0.79588
chr01	185190	185190	S	0.79588
chr01	185192	185194	M	0.79588
chr01	185197	185197	S	0.79588
chr01	185200	185200	S	0.79588
chr01	185204	185204	I	0.79588
chr01	185208	185208	D	0.79588
chr01	185211	185212	D	0.79588
chr01	185215	185215	S	0.79588
chr01	185218	185218	I	0.79588
chr01	185222	185222	I	0.79588
chr01	185230	185230	S	0.79588
chr01	185237	185237	D	0.79588
chr01	185240	185240	S	0.79588
chr01	185243	185248	D	0.79588
chr01	185250	185250	I	0.79588
chr01	185252	185252	I	0.79588
chr01	185258	185258	I	0.79588
chr01	185260	185260	I	0.79588
chr01	185262	185262	I	0.79588
chr01	185264	185264	D	0.79588
chr01	185266	185266	D	0.79588
chr01	185272	185272	S	0.79588
chr01	185281	185281	D	0.79588
chr01	185283	185283	S	0.79588
chr01	185288	185290	D	0.79588
chr01	185292	185292	I	0.79588
chr01	185294	185294	S	0.79588
chr01	185297	185297	S	0.79588
chr01	185300	185300	I	0.79588
chr01	185309	185309	S	0.79588
chr01	185312	185312	D	0.79588
chr01	185317	185317	S	0.79588
chr01	185322	185322	I	0.79588
chr01	185326	185326	D	0.79588
chr01	185329	185329	S	0.79588
chr01	185332	185332	S	0.79588
chr01	185334	185334	I	0.79588
chr01	185335	185335	S	0.79588
chr01	185338	185338	D	0.79588
chr01	185341	185341	S	0.79588
chr01	185343	185343	S	0.79588
chr01	185347	185347	S	0.79588
chr01	185358	185358	I	0.79588
chr01	185358	185358	I	0.79588
chr01	185360	185362	M	0.79588
chr01	185368	185370	M	0.79588
chr01	185370	185370	I	0.79588
chr01	185375	185375	D	0.79588
chr01	185376	185376	I	0.79588
chr01	185378	185378	I	0.79588
chr01	185380	185381	D	0.79588
chr01	185384	185386	M	0.79588
chr01	185389	185389	D	0.79588
chr01	185391	185393	D	0.79588
chr01	185399	185399	S	0.79588
chr01	185404	185404	I	0.79588
chr01	185406	185406	I	0.79588
chr01	185407	185407	S	0.79588
chr01	185412	185412	D	0.79588
chr01	185414	185415	D	0.79588
chr01	185419	185419	D	0.79588
chr01	185420	185420	S	0.79588
chr01	185422	185422	I	0.79588
chr01	185430	185430	I	0.79588
chr01	185432	185433	D	0.79588
chr01	185436	185438	M	0.79588
chr01	185440	185440	D	0.79588
chr01	185444	185444	I	0.79588
chr01	185446	185446	I	0.79588
chr01	185449	185449	D	0.79588
chr01	185451	185451	D	0.79588
chr01	185458	185458	S	0.79588
chr01	185460	185460	I	0.79588
chr01	185461	185461	S	0.79588
chr01	185466	185467	D	0.79588
chr01	185468	185468	S	0.79588
chr01	185472	185472	I	0.79588
chr01	185474	185474	I	0.79588
chr01	185474	185474	I	0.79588
chr01	185476	185476	I	0.79588
chr01	185478	185478	I	0.79588
chr01	185480	185480	I	0.79588
chr01	185482	185482	I	0.79588
chr01	185486	185486	I	0.79588
chr01	185488	185488	I	0.79588
chr01	185492	185492	I	0.79588
chr01	185499	185500	D	0.79588
chr01	185502	185502	I	0.79588
chr01	185503	185504	D	0.79588
chr01	185508	185508	I	0.79588
chr01	185510	185510	D	0.79588
chr01	185513	185513	S	0.79588
chr01	185516	185516	I	0.79588
chr01	185519	185520	D	0.79588
chr01	185523	185525	D	0.79588
chr01	185529	185529	S	0.79588
chr01	185532	185532	I	0.79588
chr01	185536	185536	I	0.79588
chr01	185538	185538	I	0.79588
chr01	185540	185540	S	0.79588
chr01	185544	185544	I	0.79588
chr01	185546	185546	I	0.79588
chr01	185546	185546	I	0.79588
chr01	185550	185550	I	0.79588
chr01	185552	185552	I	0.79588
chr01	185554	185554	I	0.79588
chr01	185556	185556	I	0.79588
chr01	185558	185558	I	0.79588
chr01	185558	185558	I	0.79588
chr01	185560	185560	I	0.79588
chr01	185564	185564	D	0.79588
chr01	185566	185566	I	0.79588
chr01	185568	185568	I	0.79588
chr01	185570	185570	I	0.79588
chr01	185574	185574	I	0.79588
chr01	185575	185575	S	0.79588
chr01	185578	185578	I	0.79588
chr01	185579	185579	S	0.79588
chr01	185582	185582	I	0.79588
chr01	185586	185586	I	0.79588
chr01	185586	185586	I	0.79588
chr01	185587	185587	S	0.79588
chr01	185591	185592	D	0.79588
chr01	185594	185594	I	0.79588
chr01	185596	185597	M	0.79588
chr01	185600	185600	D	0.79588
chr01	185604	185604	I	0.79588
chr01	185608	185608	I	0.79588
chr01	185610	185610	I	0.79588
chr01	185613	185614	D	0.79588
chr01	185616	185616	I	0.79588
chr01	185620	185620	I	0.79588
chr01	185620	185620	I	0.79588
chr01	185624	185624	I	0.79588
chr01	185628	185630	M	0.79588
chr01	185636	185637	D	0.79588
chr01	185642	185642	I	0.79588
chr01	185645	185645	D	0.79588
chr01	185648	185648	I	0.79588
chr01	185650	185650	D	0.79588
chr01	185652	185652	I	0.79588
chr01	185654	185654	I	0.79588
chr01	185656	185656	I	0.79588
chr01	185660	185660	I	0.79588
chr01	185660	185660	I	0.79588
chr01	185662	185662	I	0.79588
chr01	185664	185664	I	0.79588
chr01	185664	185664	I	0.79588
chr01	185668	185668	I	0.79588
chr01	185670	185670	I	0.79588
chr01	185672	185672	I	0.79588
chr01	185674	185674	I	0.79588
chr01	185676	185676	I	0.79588
chr01	185678	185678	I	0.79588
chr01	185684	185684	I	0.79588
chr01	185684	185684	I	0.79588
chr01	185686	185686	I	0.79588
chr01	185692	185692	I	0.79588
chr01	185696	185696	D	0.79588
chr01	185698	185698	I	0.79588
chr01	185700	185700	I	0.79588
chr01	185700	185700	S	0.79588
chr01	185702	185702	I	0.79588
chr01	185706	185706	I	0.79588
chr01	185706	185706	I	0.79588
chr01	185710	185710	I	0.79588
chr01	185714	185714	I	0.79588
chr01	185718	185718	I	0.79588
chr01	185720	185720	I	0.79588
chr01	185722	185722	I	0.79588
chr01	185724	185724	I	0.79588
chr01	185726	185726	I	0.79588
chr01	185728	185728	I	0.79588
chr01	185731	185731	S	0.79588
chr01	185734	185734	I	0.79588
chr01	185738	185738	I	0.79588
chr01	185742	185742	I	0.79588
chr01	185744	185744	I	0.79588
chr01	185746	185746	I	0.79588
chr01	185748	185748	I	0.79588
chr01	185748	185748	I	0.79588
chr01	185750	185750	I	0.79588
chr01	185754	185754	I	0.79588
chr01	185756	185756	I	0.79588
chr01	185762	185762	M	0.79588
chr01	185768	185768	I	0.79588
chr01	185772	185772	I	0.79588
chr01	185774	185774	S	0.79588
chr01	185776	185776	S	0.79588
chr01	185780	185780	I	0.79588
chr01	185786	185786	D	0.79588
chr01	185789	185789	S	0.79588
chr01	185792	185792	I	0.79588
chr01	185794	185794	I	0.79588
chr01	185798	185798	I	0.79588
chr01	185800	185802	M	0.79588
chr01	185802	185802	I	0.79588
chr01	185804	185804	I	0.79588
chr01	185804	185804	I	0.79588
chr01	185809	185809	S	0.79588
chr01	185812	185812	I	0.79588
chr01	185816	185816	I	0.79588
chr01	185816	185816	I	0.79588
chr01	185818	185818	I	0.79588
chr01	185818	185818	I	0.79588
chr01	185820	185820	I	0.79588
chr01	185822	185822	I	0.79588
chr01	185824	185824	I	0.79588
chr01	185824	185824	I	0.79588
chr01	185826	185826	I	0.79588
chr01	185830	185830	I	0.79588
chr01	185830	185830	I	0.79588
chr01	185832	185832	I	0.79588
chr01	185832	185832	I	0.79588
chr01	185834	185834	I	0.79588
chr01	185834	185834	I	0.79588
chr01	185837	185838	D	0.79588
chr01	185842	185842	I	0.79588
chr01	185844	185844	I	0.79588
chr01	185846	185846	I	0.79588
chr01	185848	185848	I	0.79588
chr01	185850	185850	S	0.79588
chr01	185852	185852	I	0.79588
chr01	185854	185854	I	0.79588
chr01	185856	185858	M	0.79588
chr01	185860	185862	D	0.79588
chr01	185869	185872	M	0.79588
chr01	185874	185874	I	0.79588
chr01	185876	185877	D	0.79588
chr01	185879	185879	D	0.79588
chr01	185882	185882	I	0.79588
chr01	185884	185884	I	0.79588
chr01	185886	185889	D	0.79588
chr01	185894	185894	D	0.79588
chr01	185896	185896	D	0.79588
chr01	185902	185902	I	0.79588
chr01	185904	185904	I	0.79588
chr01	185904	185904	I	0.79588
chr01	185906	185906	I	0.79588
chr01	185906	185906	I	0.79588
chr01	185908	185908	I	0.79588
chr01	185908	185908	I	0.79588
chr01	185913	185913	D	0.79588
chr01	185916	185918	D	0.79588
chr01	185920	185920	I	0.79588
chr01	185922	185922	I	0.79588
chr01	185924	185926	D	0.79588
chr01	185928	185928	I	0.79588
chr01	185930	185930	I	0.79588
chr01	185934	185934	I	0.79588
chr01	185937	185938	M	0.79588
chr01	185941	185941	S	0.79588
chr01	185944	185945	M	0.79588
chr01	185946	185946	I	0.79588
[truncated: 47,781 more rows]
